# Supplementary material for: Novel efficient fluorophores synthesized from citric acid
Source: Royal Society of Chemistry journal article supplement (doi:10.1039/c5ra03226a), 2015-01-01
Supplement: c5ra03226a1.pdf [file c5ra03226a1.pdf]

## Supplementary Materials

### Novel efficient fluorophores synthesized from citric acid

Wiktoria Kasprzyk, Szczepan Bednarz, Paweł Żmudzki, Mateusz Galica and Dariusz Bogdał

#### Experimental

Citric acid, L-cysteine, o-aminothiophenol, o-aminophenol, o-phenylenediamine, trifluoroacetic acid, glutathione, 1,2-diaminopropane, N-methylethylenediamine, ethanoloamine, 1,3-diaminopropane and 3-amino-1-propanol were supplied by Sigma-Aldrich. Cysteamine hydrochloride was supplied by Merck. Ethanol 99.8%, dichloromethane, p-xylene, hydrochloric acid, sodium hydroxide were supplied by POCH (Poland).

#### Synthesis and characterization of (1b-5b)

Citric acid was mixed with an amine source (cysteamine, L-cysteine, o-aminothiophenol, o-phenylenediamine or o-aminophenol) in molar ratio 1:1, thus the total weight of the reactants was 2 g. Then 2 ml of distilled water was added to dissolve reactants. Afterwards it was evaporated under vacuum oven at r.t. under 10 mbar. Then the mixture was heated for 1 h at 180°C. The yellowish product of the reaction was purified by preparative high pressure liquid chromatography (Knauer HPLC set: degasser, pump K-500, detectors RI 2300 and UV/VIS A2500) at r.t. on Eurospher 100 C-18 column and eluted by 1.35x10<sup>-3</sup> M trifluoroacetic acid in water at a flow rate 10 ml/min. The luminescent fraction of desired product was collected and freeze-dried. The chemical structure was confirmed by <sup>1</sup>H, <sup>13</sup>C and HSQC NMR experiments carried out in DMSO-d<sub>6</sub> solution using a Varian Mercury-VX 300 MHz spectrometer. ESI-MS/MS analyses were carried out using the UPLC-MS/MS system (Waters Corporation, Milford, MA, USA). High resolution mass spectra were acquired using the MALDIsynapt G2-S HDMS (Waters Corporation, Milford, MA, USA), coupled to a Waters TQD mass spectrometer (electrospray ionization mode ESI-tandem quadrupole). UV/VIS absorption spectra of solutions of isolated compounds were acquired on a PG Instruments Ltd P80+ spectrophotometer. The excitation and emission spectra were acquired using FLS980 spectrometer (Edinburgh Instruments); xenone lamp was used as a light source, Hamamatsu R928P photomultiplier detector with cooling system (-20°C). The absolute quantum yield measurements of 7x10<sup>-3</sup> g/l water solutions of achieved compounds were conducted using integrating sphere. The fluorescence intensity measurements (excitation 360 nm) were made using Ocean Optics MINI-D2 spectrofluorimeter. Fluorescence lifetime measurements were carried out at 21°C on a PTI EasyLife® instrument using 325 nm LED as an excitation source. Curve fitting and calculations were performed by EasyLife X© software.

#### Detection of fluorophores (6b-9b, 14b, 15b) in products of citric acid condensation with selected amines

Citric acid was mixed with an amine source (glutathione, 1,2-diaminopropane, N-methylethylenediamine, ethanoloamine, 1,3-diaminopropane or 3-amino-1-propanol) in molar ratio 1:1, thus the total weight of the reactants was 2 g. Then 2 ml of distilled water was added to dissolve reactants. Afterwards water was evaporated in vacuum oven at r.t. under 10mbar. Then the mixture was heated for 1h at 180°C. The identification of fluorescent compounds was achieved by HR-ESI-MS and ESI-MS/MS fragmentation patterns of molecular ions. ESI-MS/MS analyses were carried out using the UPLC-MS/MS system (Waters Corporation, Milford, MA, USA). High resolution mass spectra were acquired using the MALDIsynapt G2-S HDMS (Waters Corporation, Milford, MA, USA), coupled to a Waters TQD mass spectrometer (electrospray ionization mode ESI-tandem quadrupole).

**<sup>1</sup>H NMR (300 MHz, dms<sub>o</sub>)**

δ 6.54 (d, J = 1.5 Hz, 1H), 6.50 (d, J = 1.5 Hz, 1H), 4.33 (t, J = 7.5 Hz, 2H), 3.49 (t, J = 7.6 Hz, 2H).

**<sup>13</sup>C NMR (75 MHz, dms<sub>o</sub>)**

δ 166.12, 161.15, 150.41, 142.53, 115.17, 98.24, 51.19, 28.51.

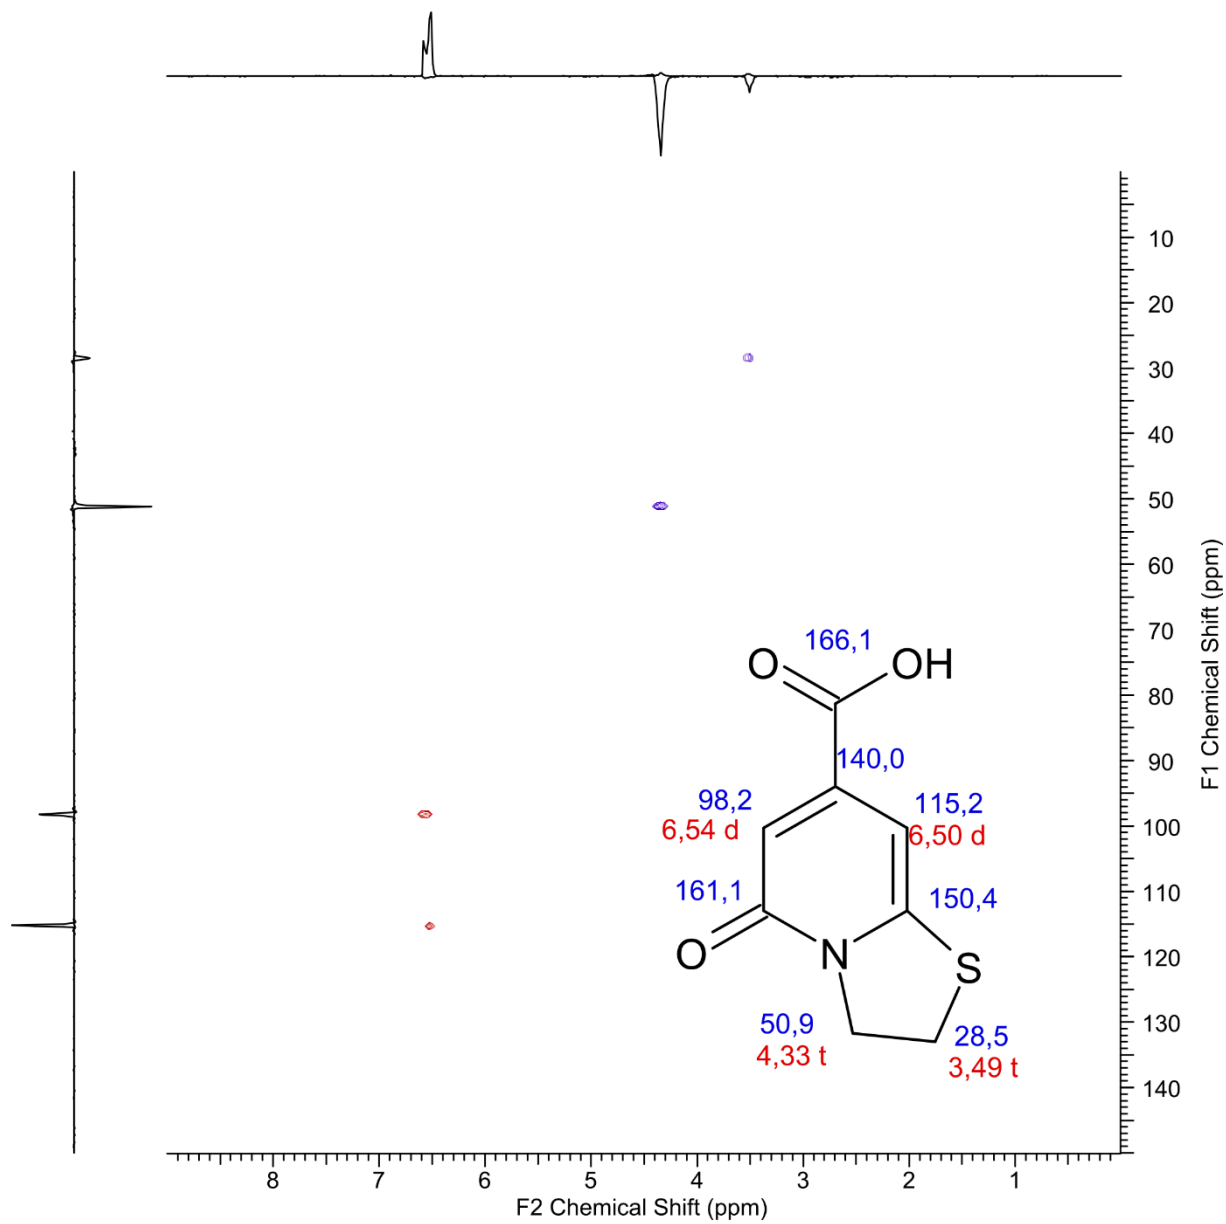

Fig. S1A HSQC spectrum and <sup>1</sup>H, <sup>13</sup>C NMR assignments of **1b**.

**<sup>1</sup>H NMR (300 MHz, dms<sub>o</sub>)**

δ 6.60 (d, J = 1.5 Hz, 1H), 6.56 (d, J = 1.5 Hz, 1H), 5.47 (dd, J = 8.9, 1.6 Hz, 1H), 3.92 (dd, J = 11.9, 9.0 Hz, 1H), 3.61 (dd, J = 11.9, 1.7 Hz, 1H).

**<sup>13</sup>C NMR (75 MHz, dms<sub>o</sub>)**

δ 169.59, 166.04, 161.07, 150.40, 143.20, 115.50, 98.39, 63.06, 32.05.

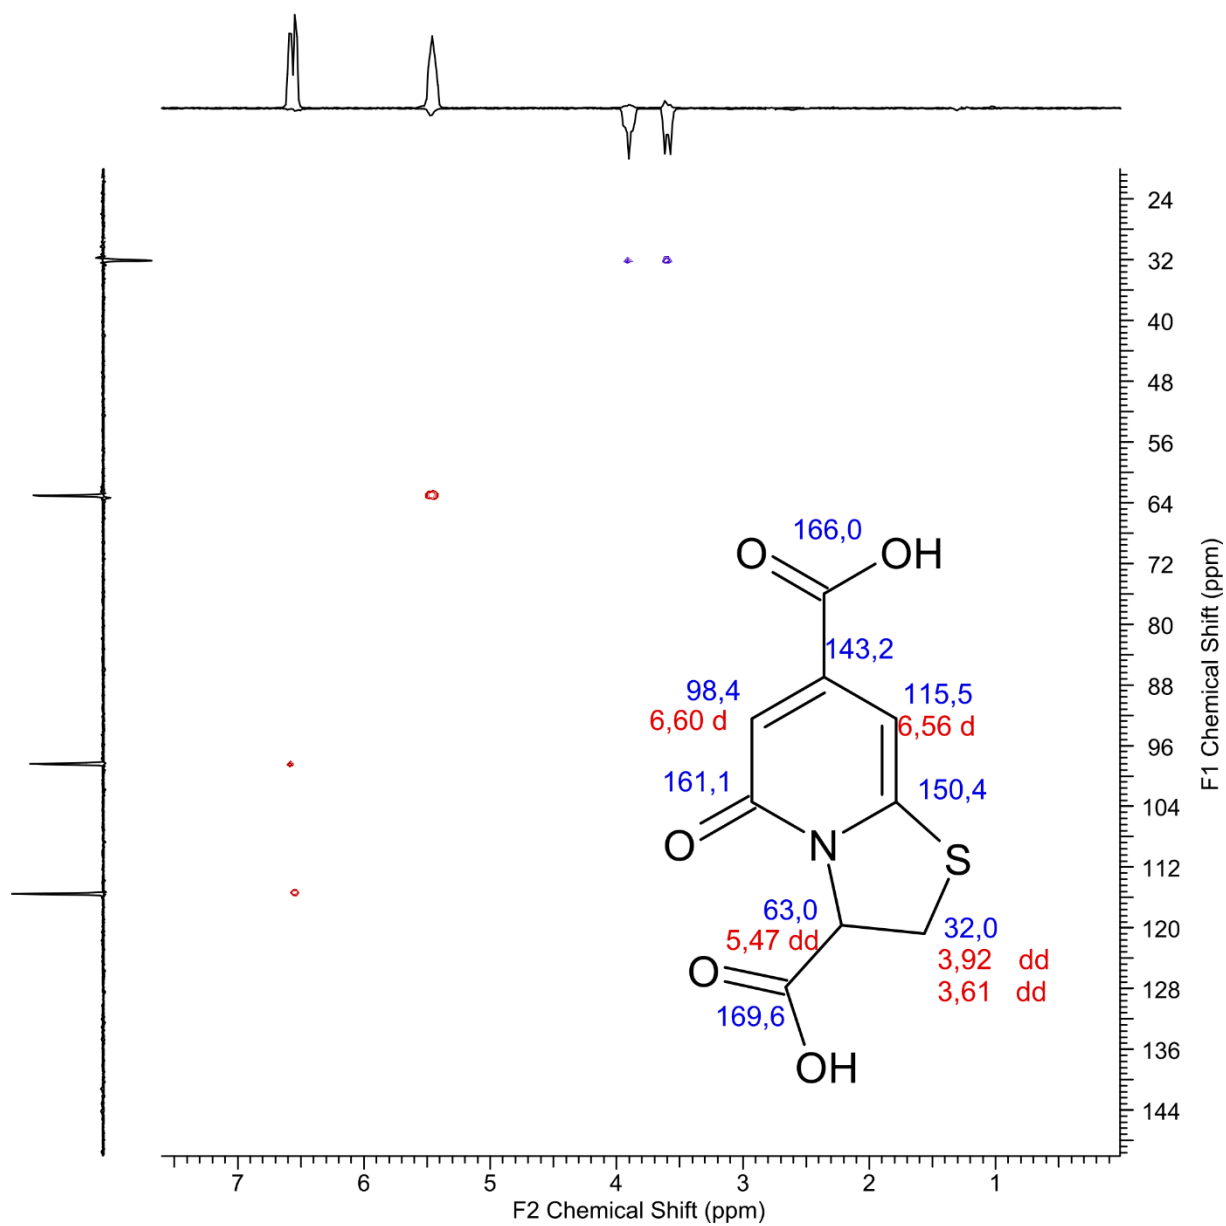

Fig. S1B HSQC spectrum and <sup>1</sup>H, <sup>13</sup>C NMR assignments of 2b.

**<sup>1</sup>H NMR (300 MHz, dms<sub>o</sub>)**

δ 8.41 (dd, J = 7.8, 1.0 Hz, 1H), 7.74 (d, J = 7.7 Hz, 1H), 7.54 (td, J = 7.9, 1.4 Hz, 1H), 7.46 (td, J = 7.7, 1.1 Hz, 1H), 6.74 (d, J = 1.3 Hz, 1H), 6.71 (d, J = 1.3 Hz, 1H).

**<sup>13</sup>C NMR (75 MHz, dms<sub>o</sub>)**

δ 166.17, 158.56, 154.03, 147.35, 142.98, 127.86, 127.18, 125.28, 116.64, 111.42, 111.31, 84.05.

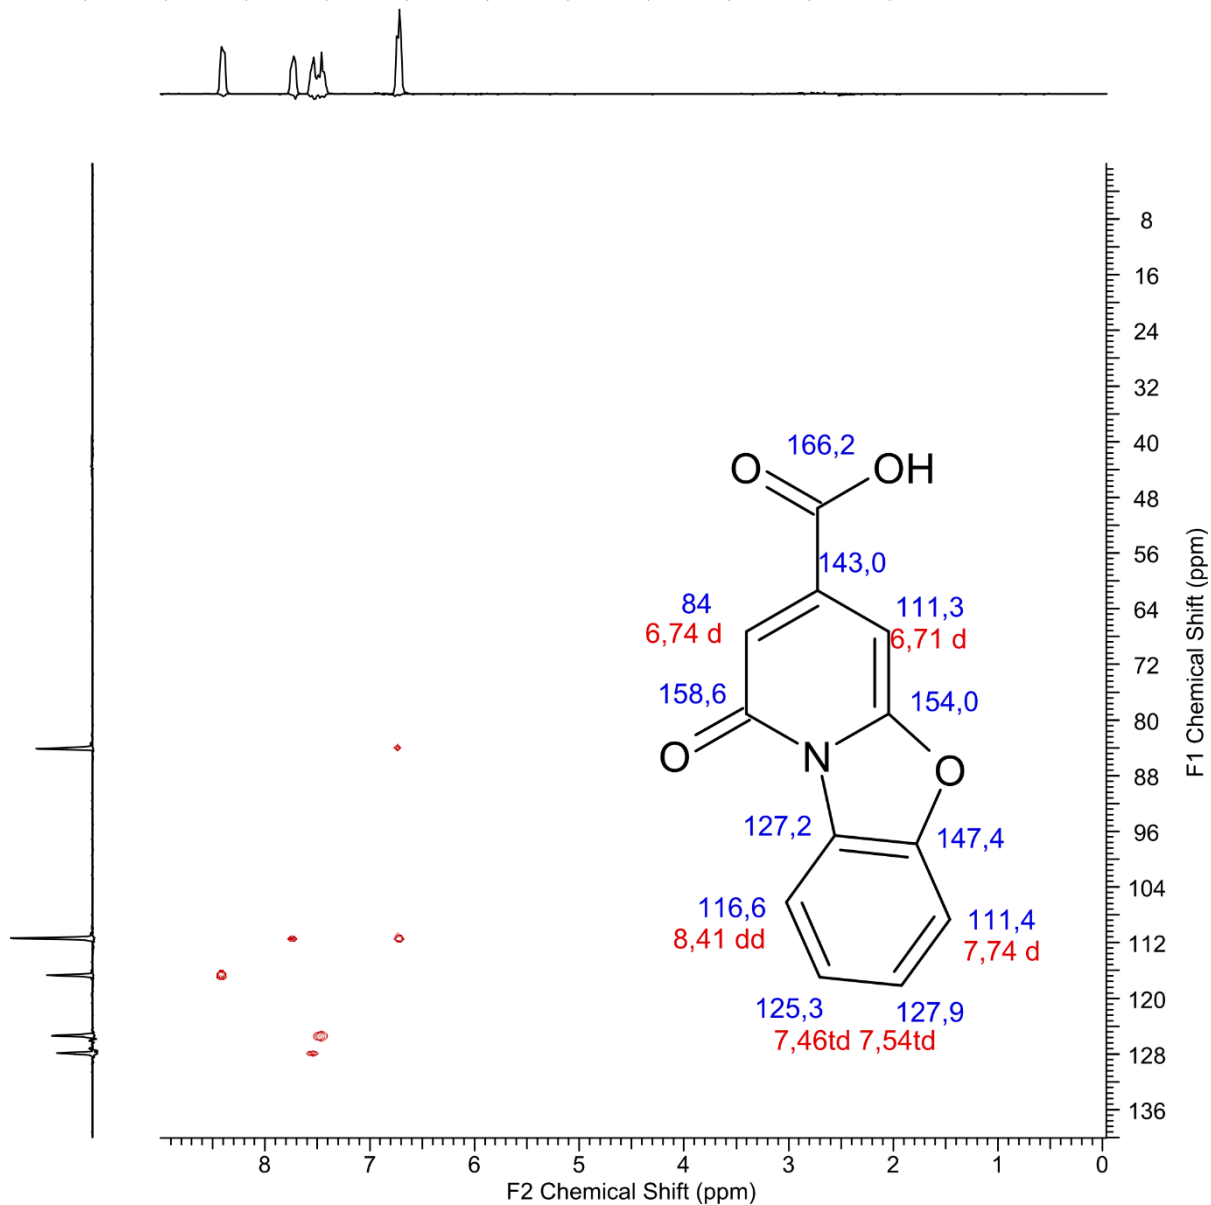

Fig. S1C HSQC spectrum and <sup>1</sup>H, <sup>13</sup>C NMR assignments of 3b.

**<sup>1</sup>H NMR (300 MHz, dmsO)**

δ 9.15 – 9.08 (m, 1H), 8.03 – 7.95 (m, 1H), 7.53 – 7.48 (m, 2H), 7.34 (d, J = 1.6 Hz, 1H), 6.76 (d, J = 1.6 Hz, 1H).

**<sup>13</sup>C NMR (75 MHz, dmsO)**

δ 166.16, 161.88, 147.71, 140.05, 138.01, 127.60, 127.24, 126.67, 123.01, 119.83, 113.34, 99.43.

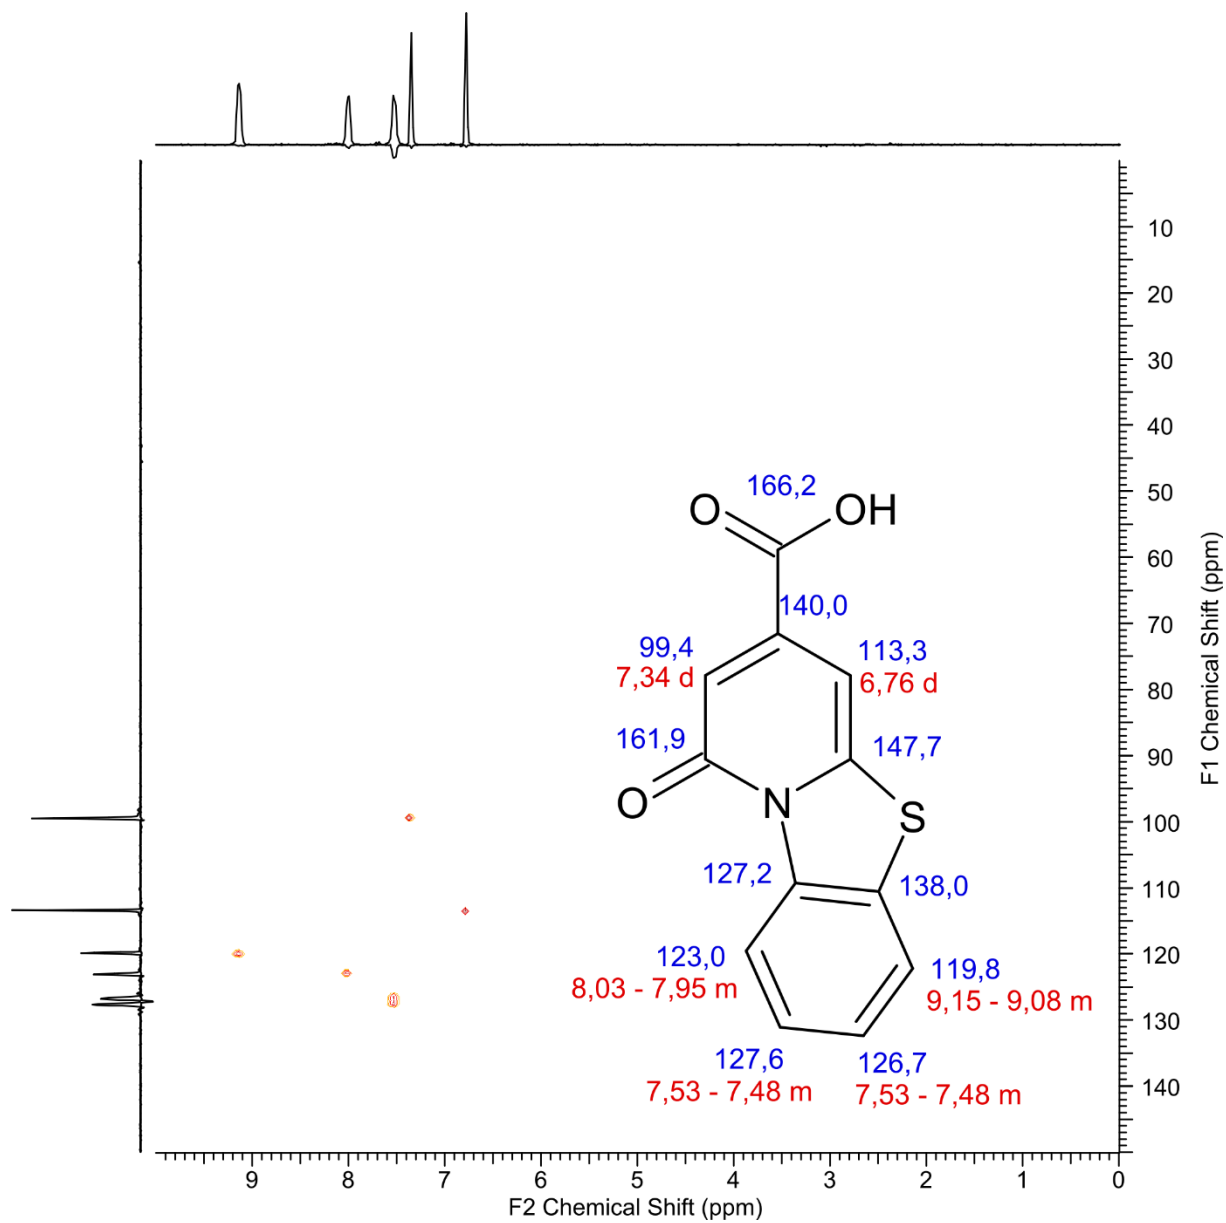

Fig. S1D HSQC spectrum and <sup>1</sup>H, <sup>13</sup>C NMR assignments of 4b.

**<sup>1</sup>H NMR (300 MHz, dms<sub>o</sub>)**

δ 8.70 (d, J = 8.1 Hz, 1H), 7.55 – 7.45 (m, 2H), 7.35 – 7.26 (m, 1H), 6.60 (d, J = 1.5 Hz, 1H), 6.36 (d, J = 1.5 Hz, 1H).

**<sup>13</sup>C NMR (75 MHz, dms<sub>o</sub>)**

δ 167.25, 159.38, 144.88, 141.08, 132.63, 127.93, 127.13, 121.69, 117.04, 111.08, 102.34, 84.01.

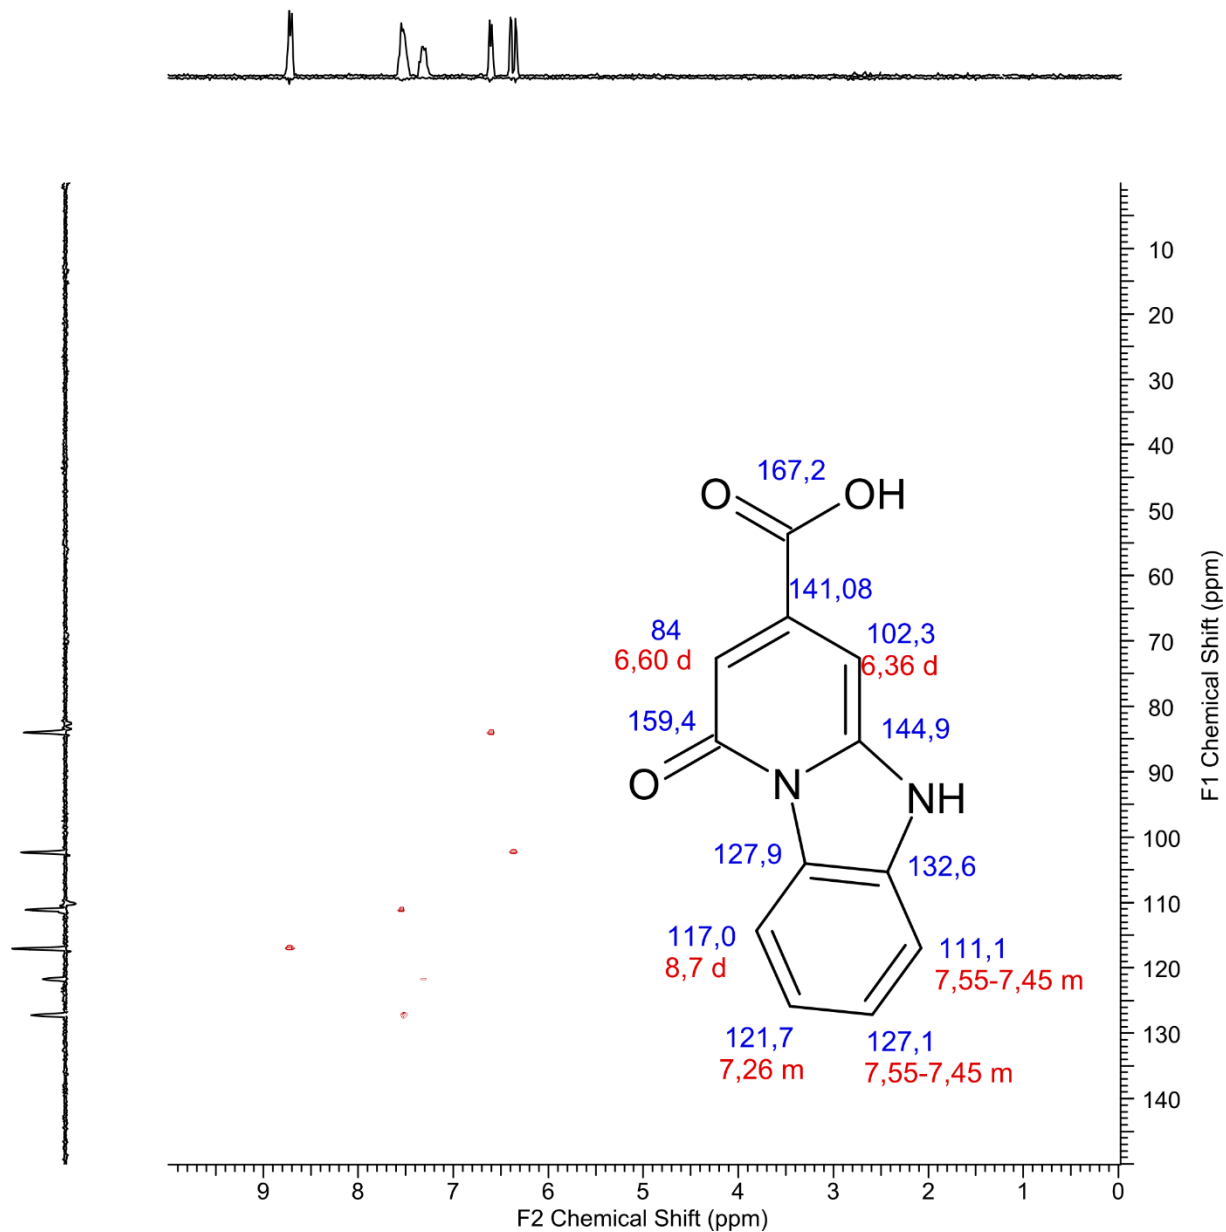

Fig. S1E HSQC spectrum and <sup>1</sup>H, <sup>13</sup>C NMR assignments of **5b**.

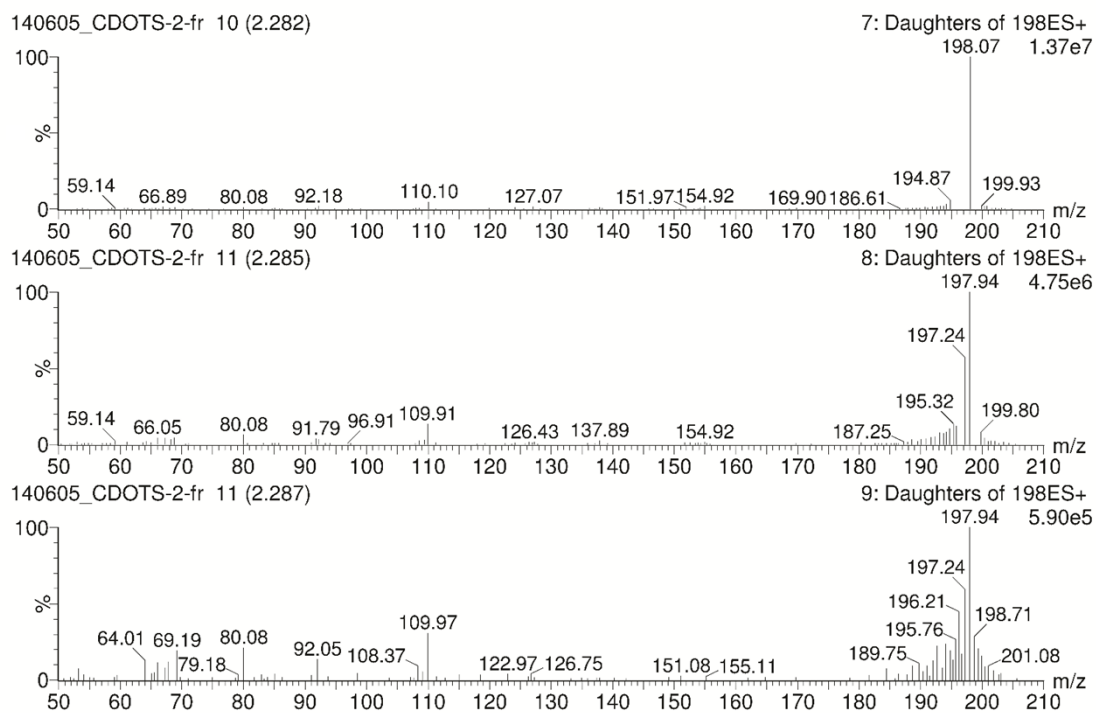

Fig. S2A ESI-MS/MS fragmentation spectra of **1b**.

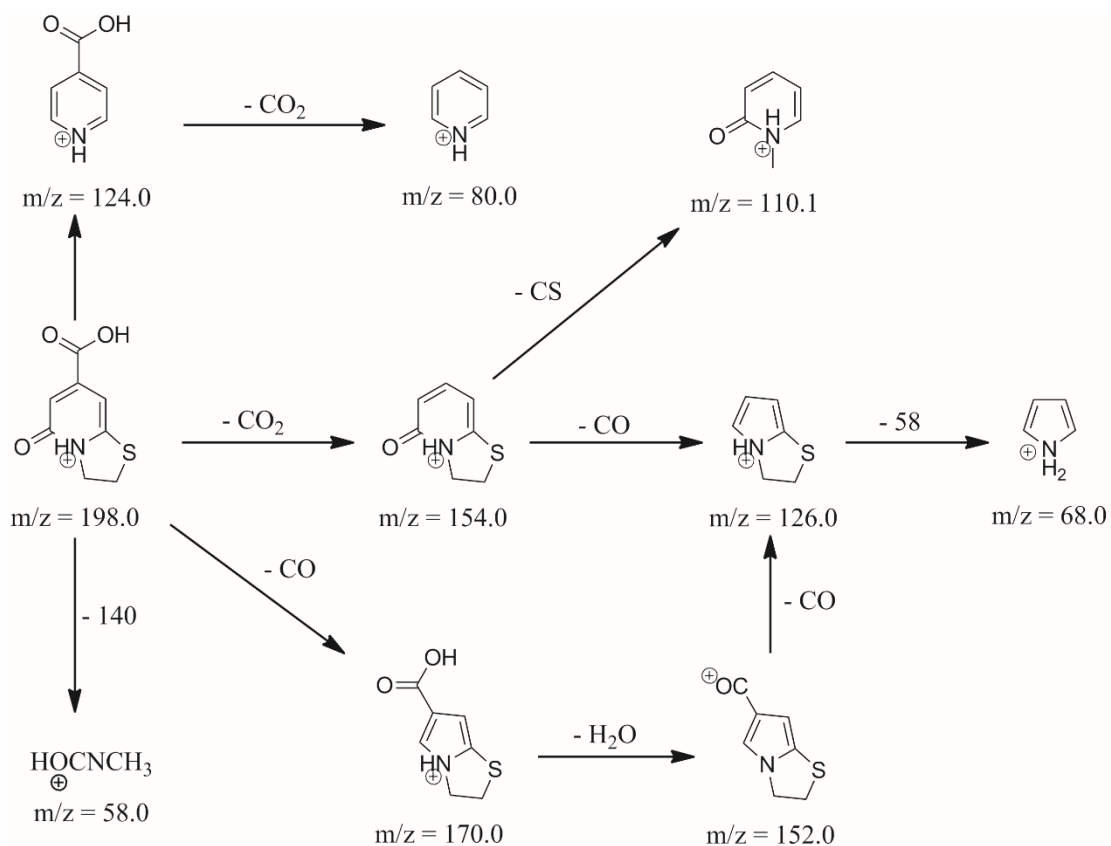

Fig. S2B ESI-MS/MS fragmentation pattern of **1b**.

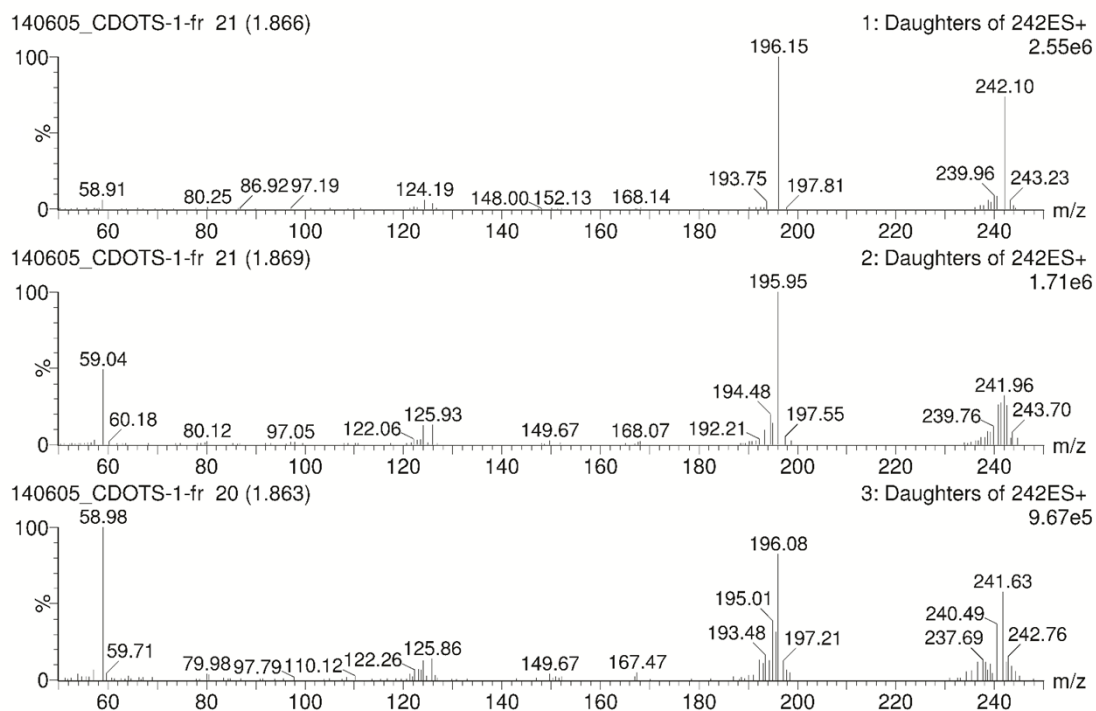

Fig. S2C ESI-MS/MS fragmentation spectra of **2b**.

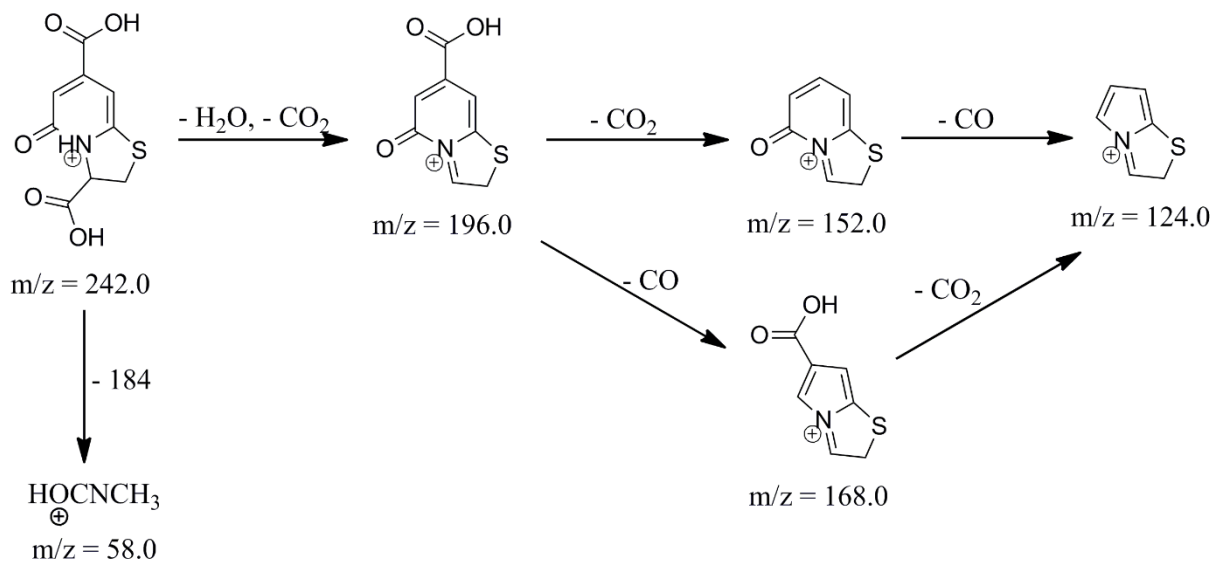

Fig. S2D ESI-MS/MS fragmentation pattern of **2b**.



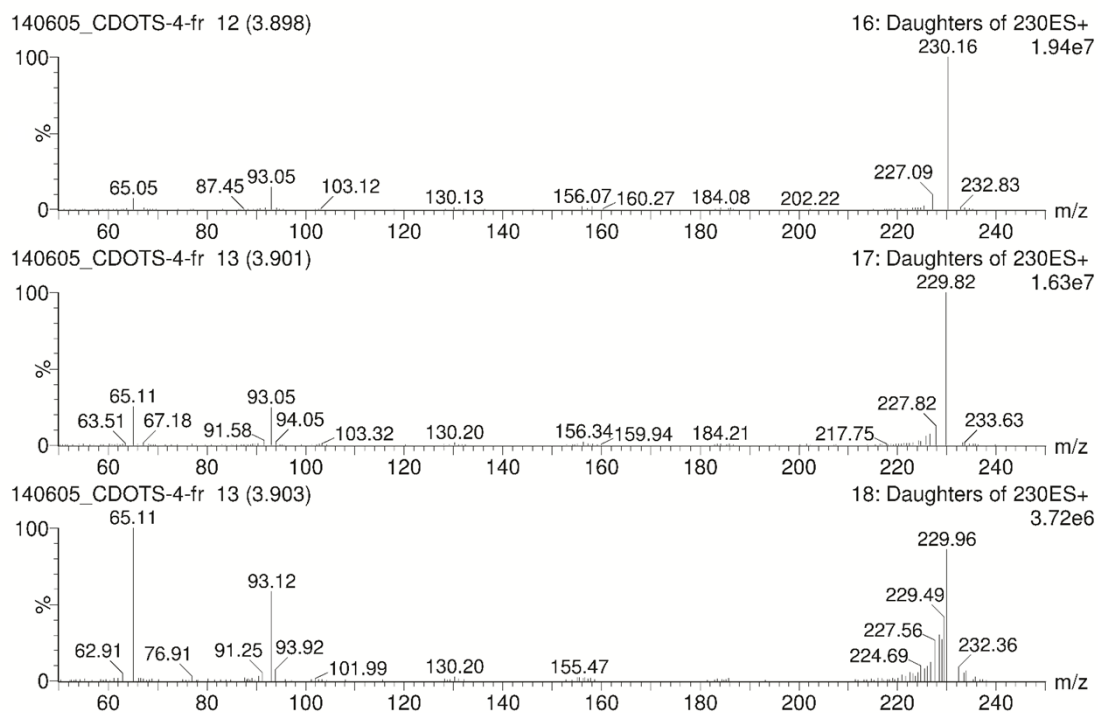

Fig. S2E ESI-MS/MS fragmentation spectra of **3b**.

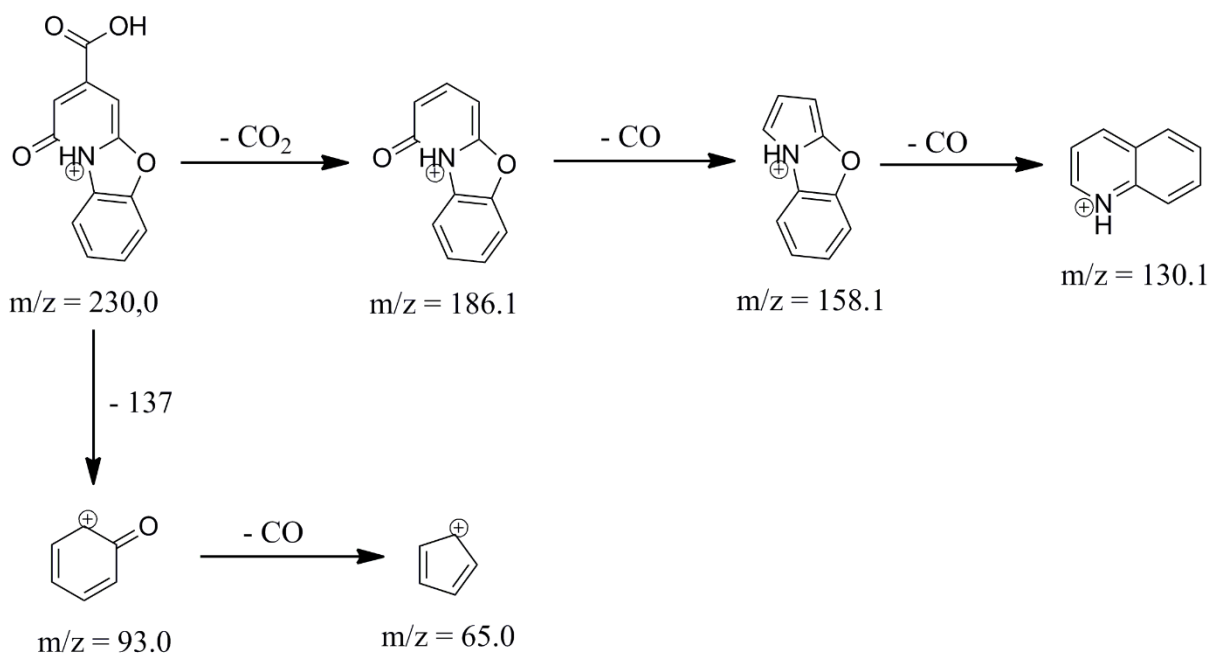

Fig. S2F ESI-MS/MS fragmentation pattern of **3b**.

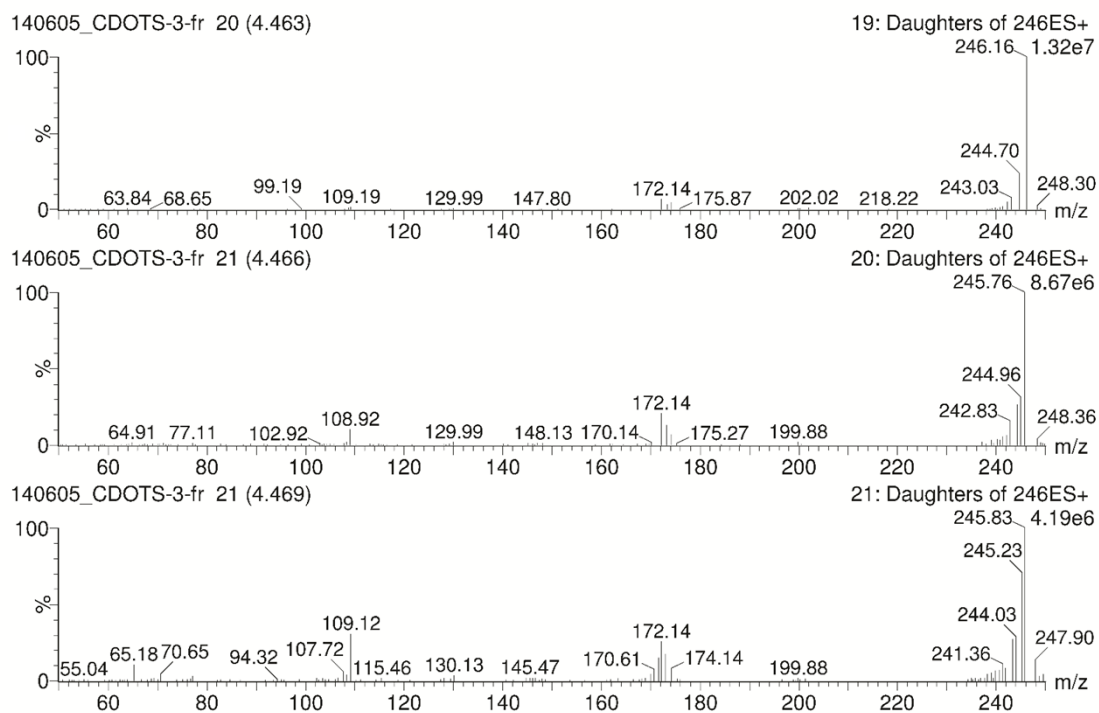

Fig. S2G ESI-MS/MS fragmentation spectra of **4b**.

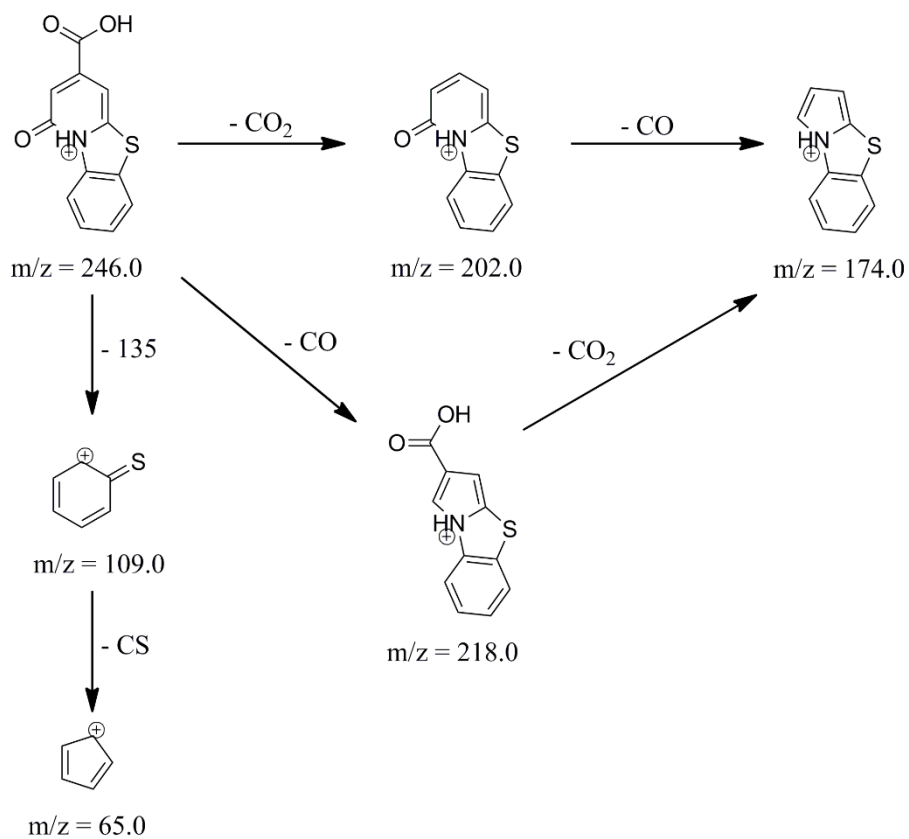

Fig. S2H ESI-MS/MS fragmentation pattern of **4b**.

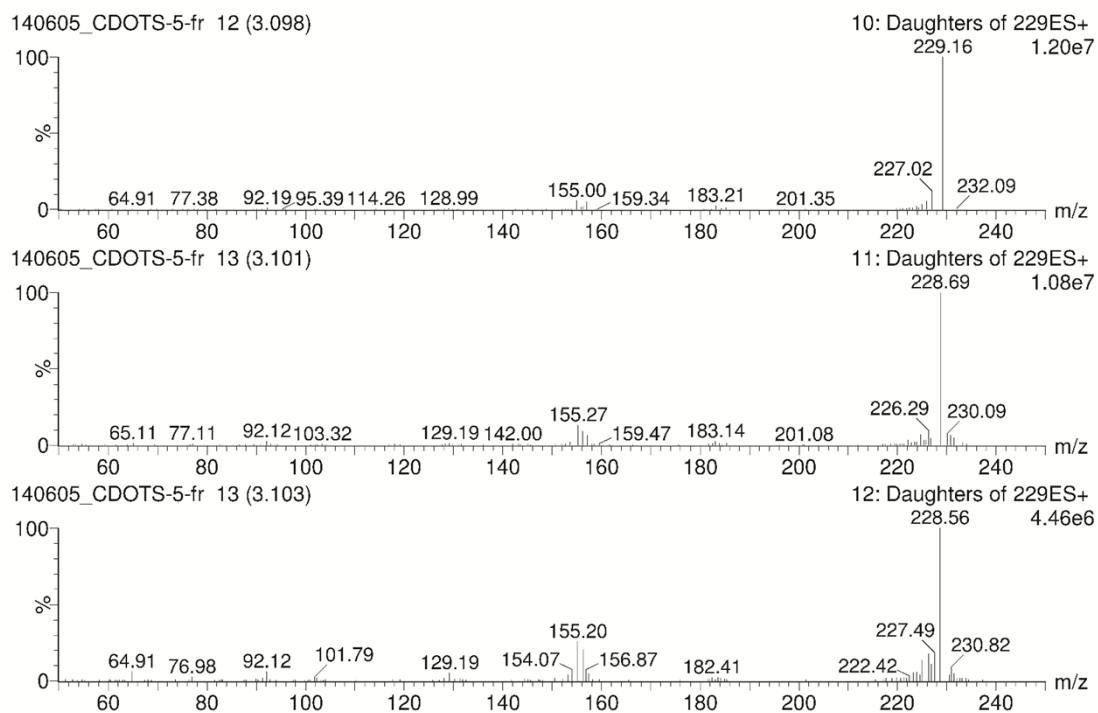

Fig. S2I ESI-MS/MS fragmentation spectra of **5b**.

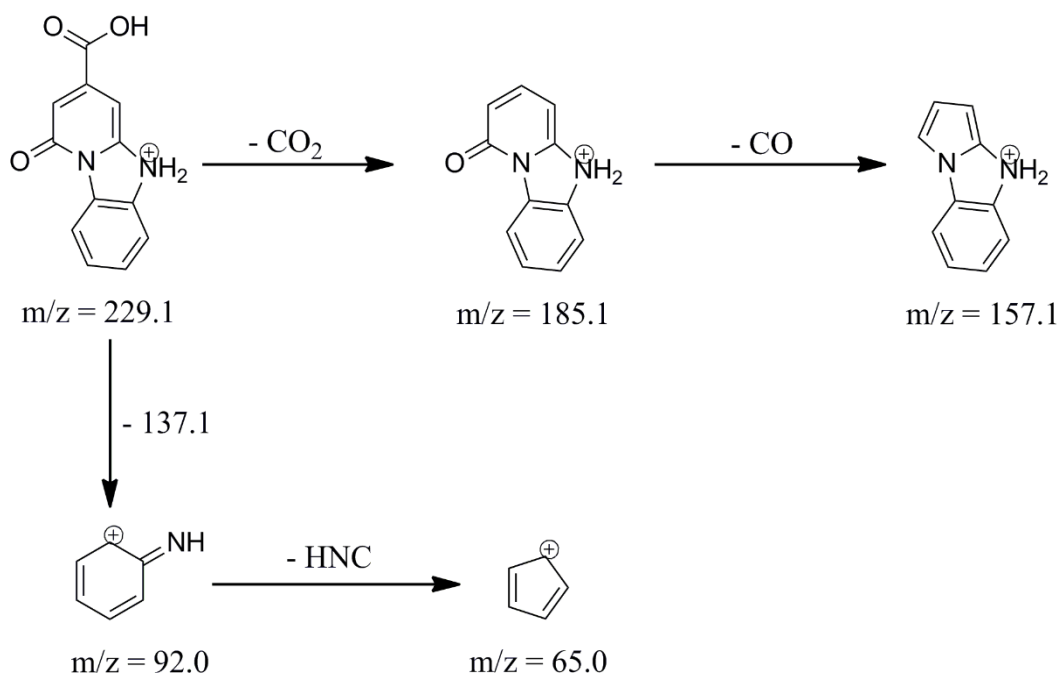

Fig. S2J ESI-MS/MS fragmentation pattern of **5b**.

Table S1 Identification of the empirical formulae of compounds **1b**, **2b**, **3b**, **4b** and **5b** using elemental analysis and HR-ESI-MS.

| Product     | Empirical formula calculated from elemental analysis         | HR-ESI-MS             |                     |                                                              |                |
|-------------|--------------------------------------------------------------|-----------------------|---------------------|--------------------------------------------------------------|----------------|
|             |                                                              | Calculated mass (M+1) | Observed mass (M+1) | Empirical formula                                            | Fit confidence |
| <b>(1b)</b> | C <sub>8</sub> H <sub>7</sub> NO <sub>3</sub> S              | 198.0225              | 198.0220            | C <sub>8</sub> H <sub>8</sub> NO <sub>3</sub> S              | 100 %          |
| <b>(2b)</b> | C <sub>9</sub> H <sub>7</sub> NO <sub>5</sub> S              | 242.0123              | 242.0124            | C <sub>9</sub> H <sub>8</sub> NO <sub>5</sub> S              | 100 %          |
| <b>(3b)</b> | C <sub>12</sub> H <sub>7</sub> NO <sub>4</sub>               | 230.0453              | 230.0452            | C <sub>12</sub> H <sub>8</sub> NO <sub>4</sub>               | 100 %          |
| <b>(4b)</b> | C <sub>12</sub> H <sub>7</sub> NO <sub>3</sub> S             | 246.0225              | 246.0228            | C <sub>12</sub> H <sub>8</sub> NO <sub>3</sub> S             | 99.99 %        |
| <b>(5b)</b> | C <sub>12</sub> H <sub>8</sub> N <sub>2</sub> O <sub>3</sub> | 229.0613              | 229.0612            | C <sub>12</sub> H <sub>9</sub> N <sub>2</sub> O <sub>3</sub> | 100 %          |

Table S2 Fluorescence properties of compounds **1b**, **2b**, **3b**, **4b** and **5b**.

| Compound | QY, % | Fluorescence lifetime, ns                      | Stokes shift, cm <sup>-1</sup> |
|----------|-------|------------------------------------------------|--------------------------------|
| (1b)     | 61    | $\tau = 7.49, \chi^2 = 1.067$                  | 5390                           |
| (2b)     | 70    | $T = 8.24, \chi^2 = 1.073$                     | 5007                           |
| (3b)     | 79    | $\tau = 7.99, \chi^2 = 1.058$                  | 3023                           |
| (4b)     | 74    | $\tau = 4.49, \chi^2 = 1.245$                  | 4016                           |
| (5b)     | 63    | $\tau_1 = 0.20, \tau_2 = 7.28, \chi^2 = 1.077$ | 3372                           |

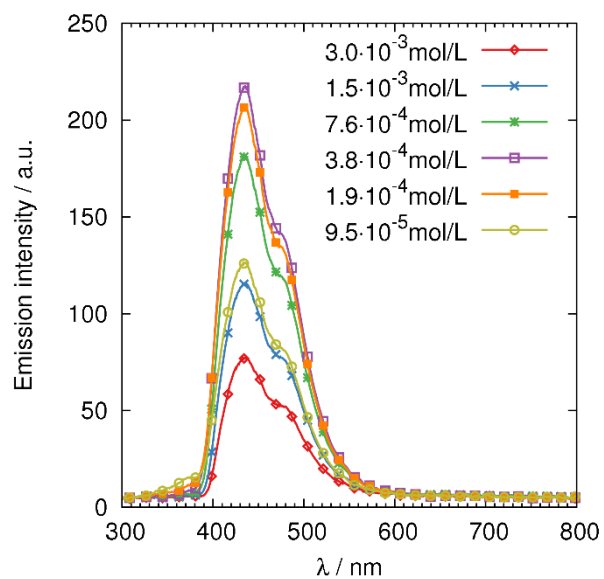

Fig. S3A Dependence of the fluorescence intensity on concentration of **1b** water solutions.

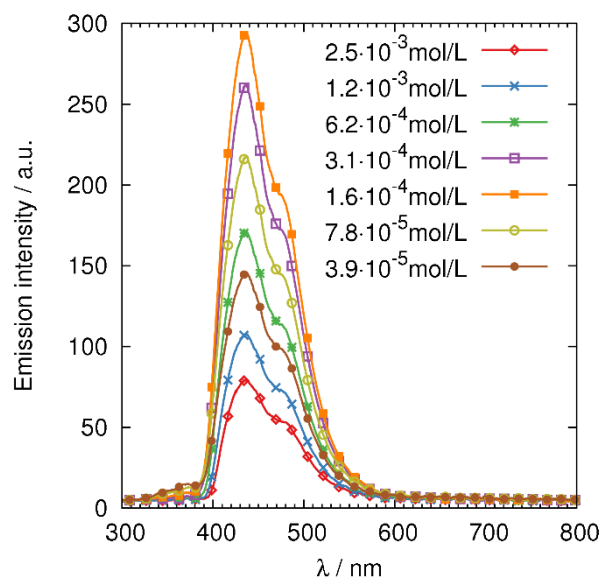

Fig. S3B Dependence of the fluorescence intensity on concentration of **2b** water solutions.

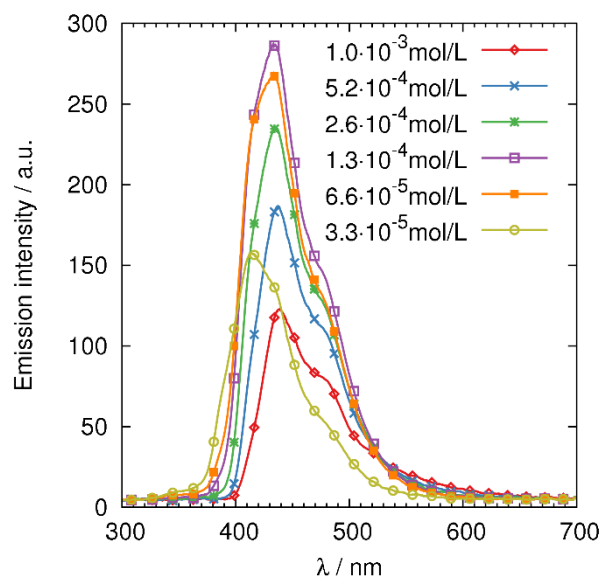

Fig. S3C Dependence of the fluorescence intensity on concentration of **3b** water solutions.

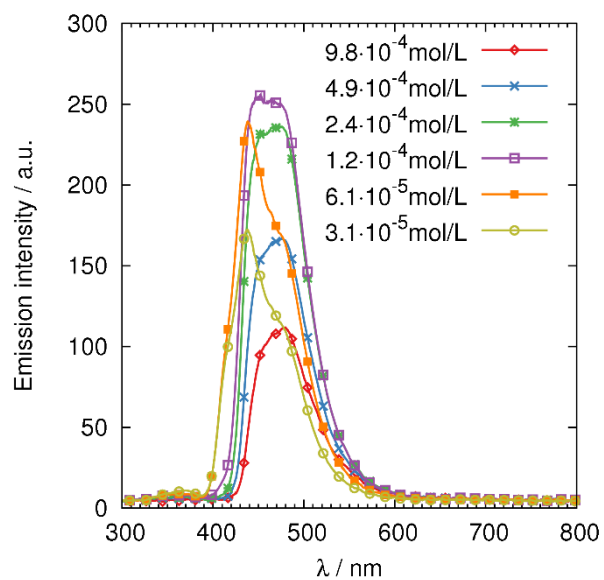

Fig. S3D Dependence of the fluorescence intensity on concentration of **4b** water solutions.

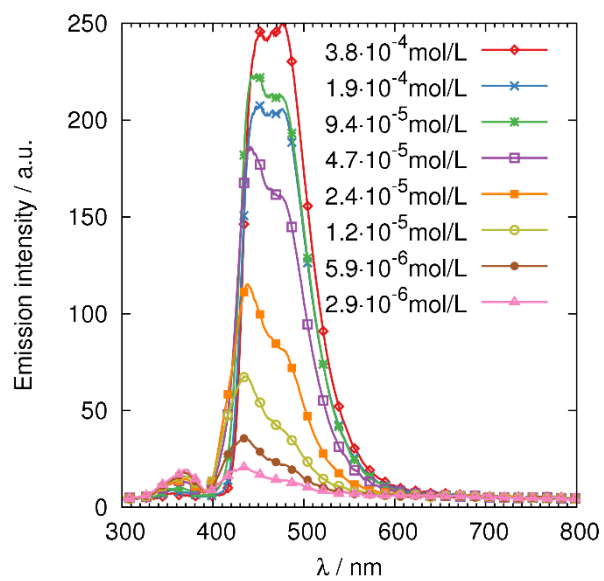

Fig. S3E Dependence of the fluorescence intensity on concentration of **5b** water solutions.

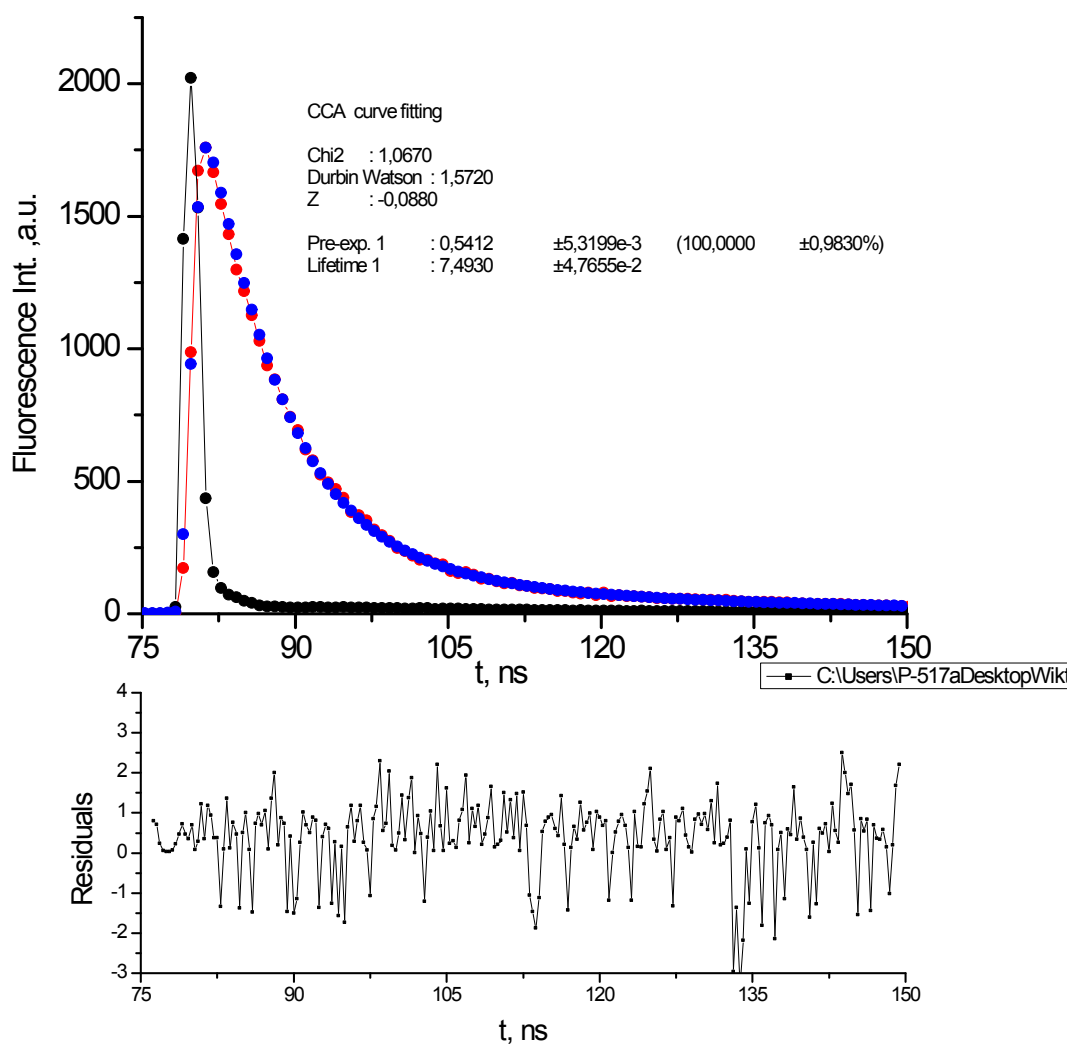

Fig. S4A Fluorescence decay curves of **1b** (325 nm LED as an excitation source was used).



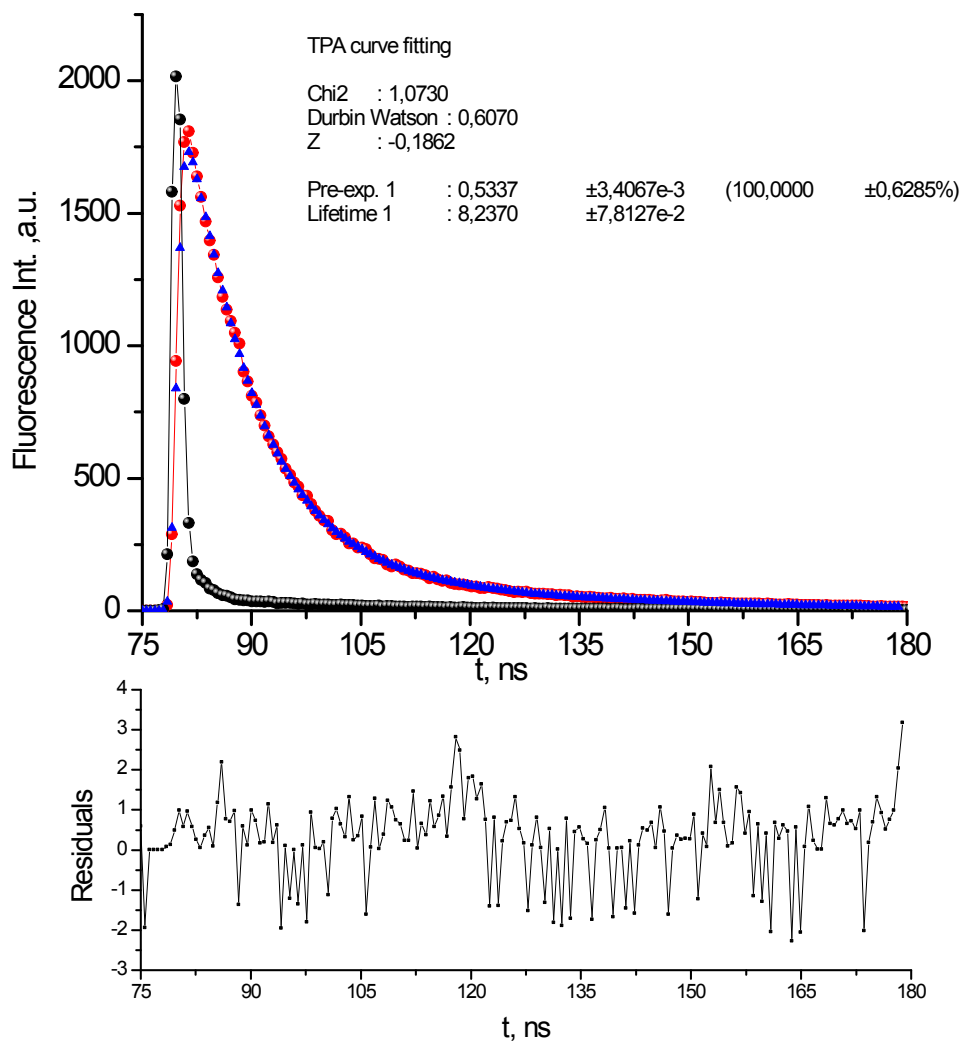

Fig. S4B Fluorescence decay curves of **2b** (325 nm LED as an excitation source was used).

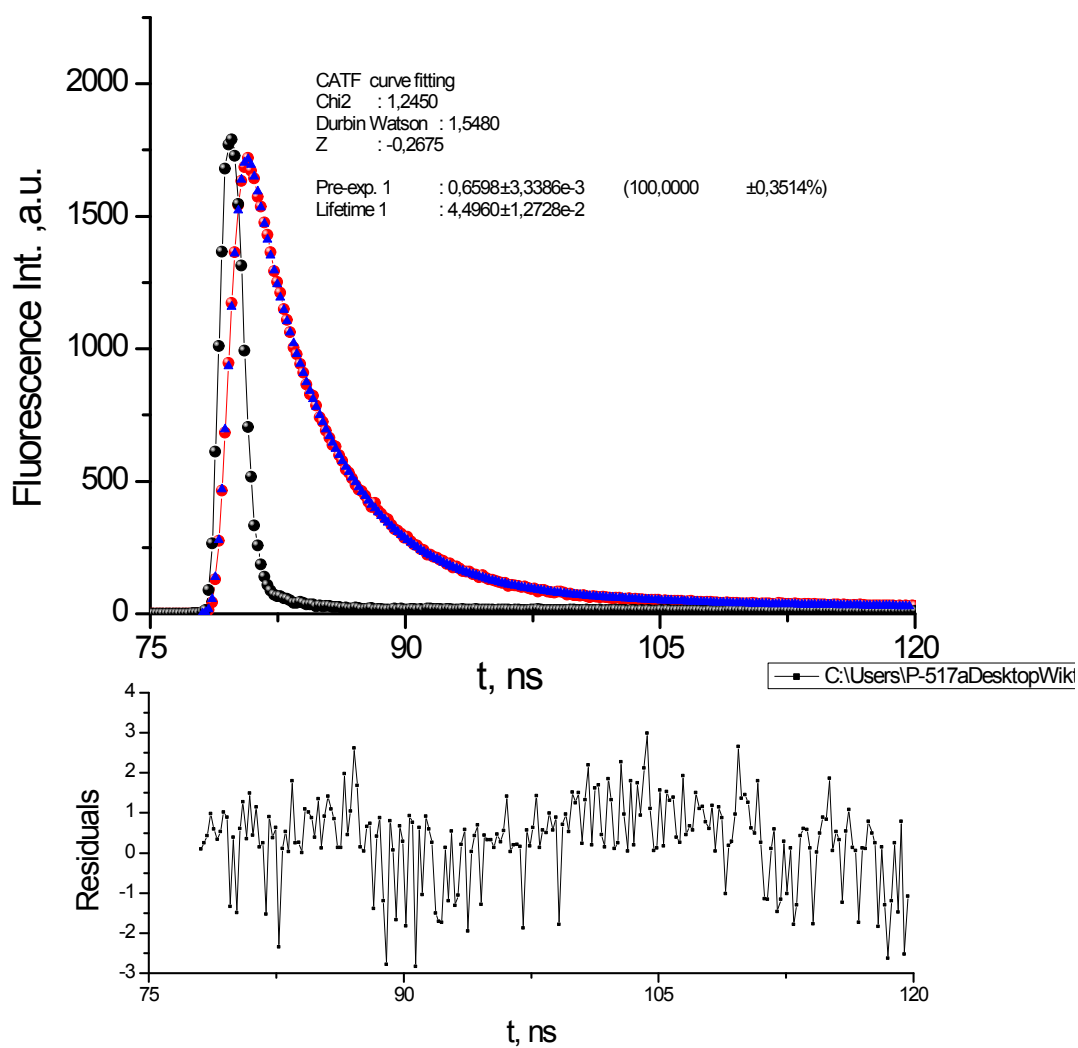

Fig. S4C Fluorescence decay curves of **3b** (325 nm LED as an excitation source was used).

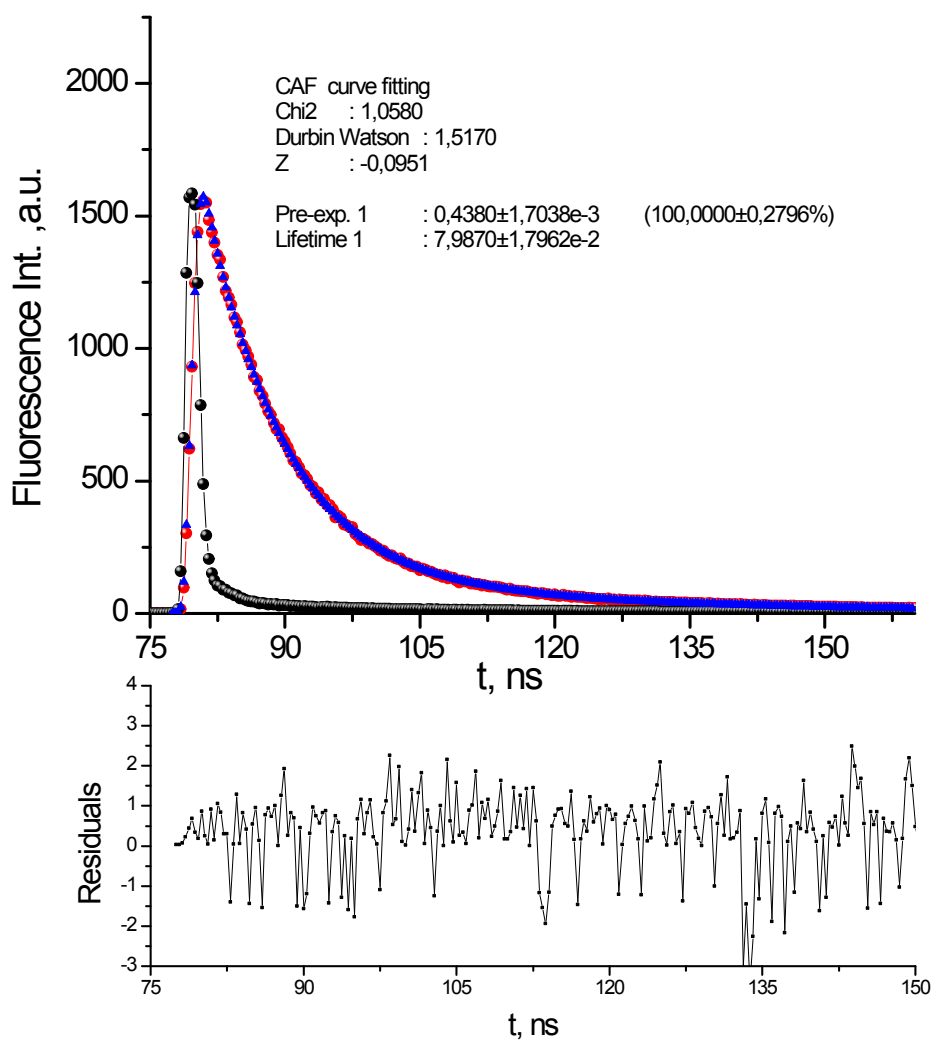

Fig. S4D Fluorescence decay curves of **4b** (325 nm LED as an excitation source was used).

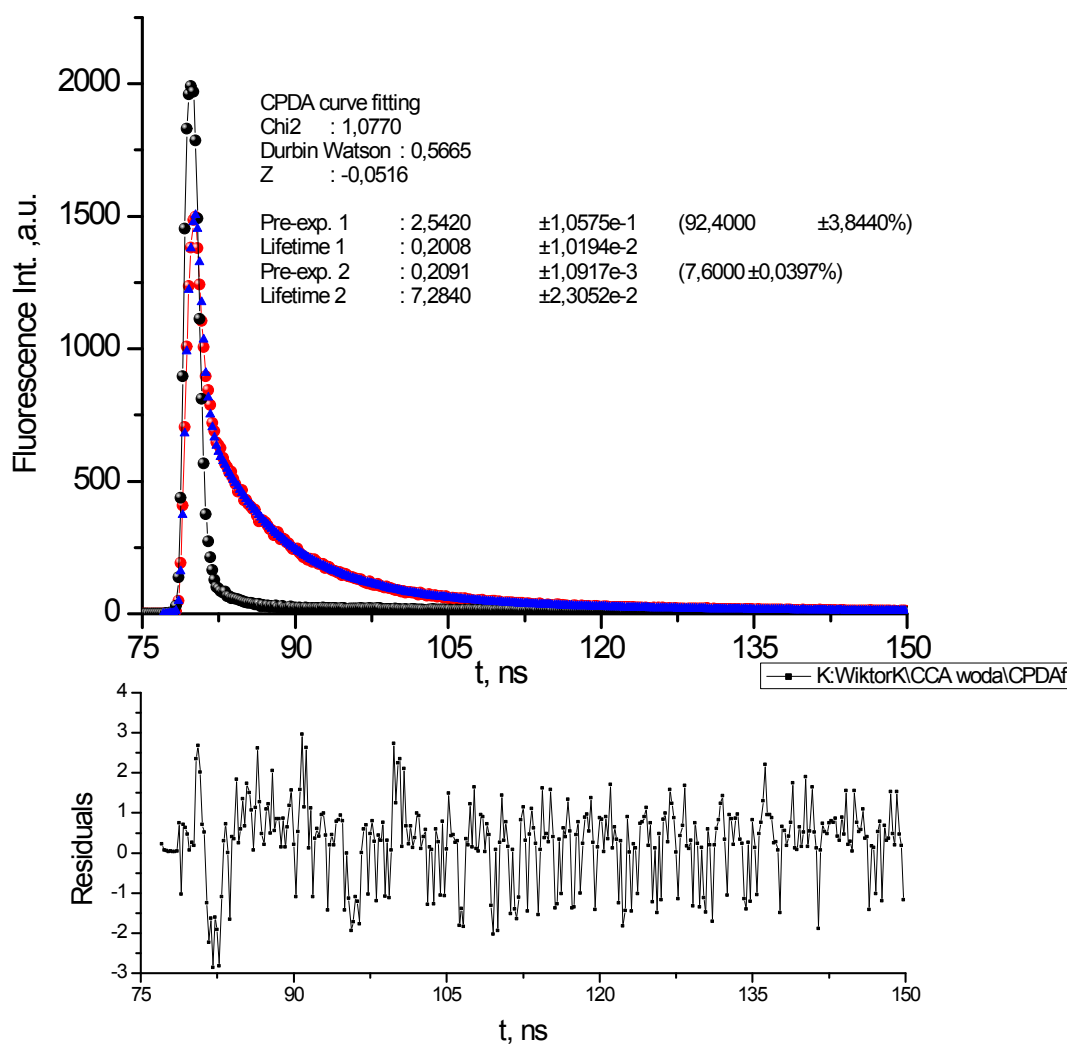

Fig. S4E Fluorescence decay curves of **5b** (325 nm LED as an excitation source was used).

Tab. S3 HR-ESI-MS data indicating the presence of compounds **6b**, **7b**, **8b**, **9b**, **14b** and **15b** in reaction mixtures.

| Compound                                                                                                                         | HR-ESI-MS             |                     |                                                                 |                |
|----------------------------------------------------------------------------------------------------------------------------------|-----------------------|---------------------|-----------------------------------------------------------------|----------------|
|                                                                                                                                  | Calculated mass (M+1) | Observed mass (M+1) | Empirical formula                                               | Fit confidence |
| 3-[(carboxymethyl)carbamoyl]-5-oxo-2,3-dihydro-5 <i>H</i> -[1,3]thiazolo[3,2- <i>a</i> ]pyridine-7-carboxylic acid ( <b>6b</b> ) | 299.0338              | 299.0333            | C <sub>11</sub> H <sub>11</sub> N <sub>2</sub> O <sub>6</sub> S | 100%           |
| 1-methyl-5-oxo-1,2,3,5-tetrahydroimidazo[1,2- <i>a</i> ]pyridine-7-carboxylic acid ( <b>7b</b> )                                 | 195.0770              | 195.0769            | C <sub>9</sub> H <sub>11</sub> N <sub>2</sub> O <sub>3</sub>    | 100%           |
| 2-methyl-5-oxo-1,2,3,5-tetrahydroimidazo[1,2- <i>a</i> ]pyridine-7-carboxylic acid ( <b>8b</b> )                                 | 195.0770              | 195.0767            | C <sub>9</sub> H <sub>11</sub> N <sub>2</sub> O <sub>3</sub>    | 100%           |
| 5-oxo-2,3-dihydro-5 <i>H</i> -[1,3]oxazolo[3,2- <i>a</i> ]pyridine-7-carboxylic acid ( <b>14b</b> )                              | 182.0453              | 182.0451            | C <sub>8</sub> H <sub>8</sub> NO <sub>4</sub>                   | 100%           |
| 6-oxo-1,3,4,6-tetrahydro-2 <i>H</i> -pyrido[1,2- <i>a</i> ]pyrimidine-8-carboxylic acid ( <b>9b</b> )                            | 195.0770              | 195.0768            | C <sub>9</sub> H <sub>11</sub> N <sub>2</sub> O <sub>3</sub>    | 100%           |
| 6-oxo-3,4-dihydro-2 <i>H</i> ,6 <i>H</i> -pyrido[2,1- <i>b</i> ][1,3]oxazine-8-carboxylic acid ( <b>15b</b> )                    | 196.0610              | 196.0610            | C <sub>9</sub> H <sub>10</sub> NO <sub>4</sub>                  | 100%           |

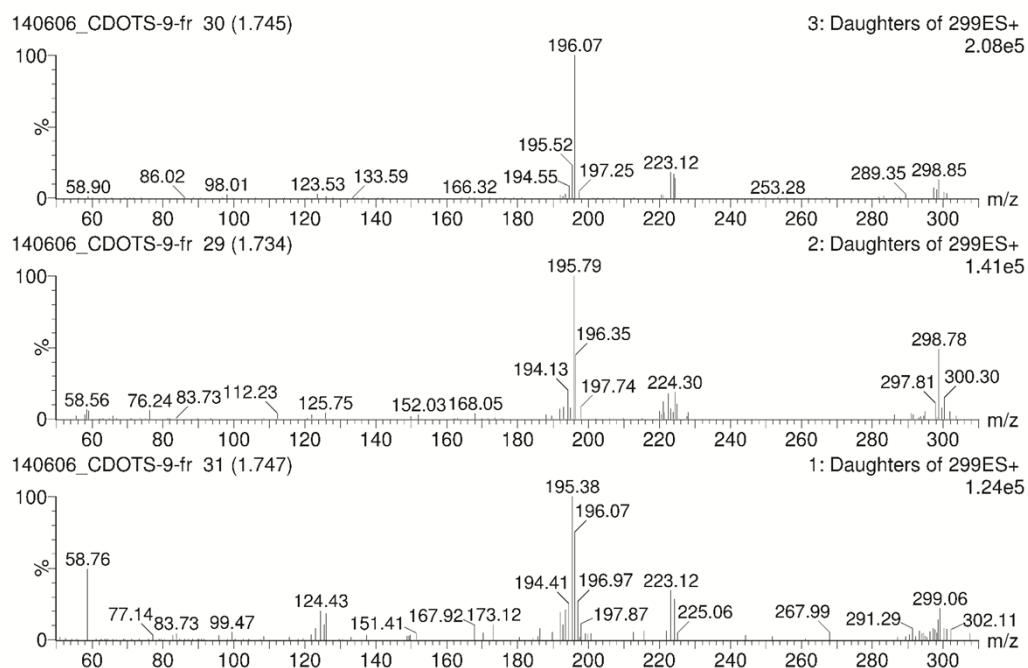

Fig. S5A ESI-MS/MS fragmentation spectra of **6b**.

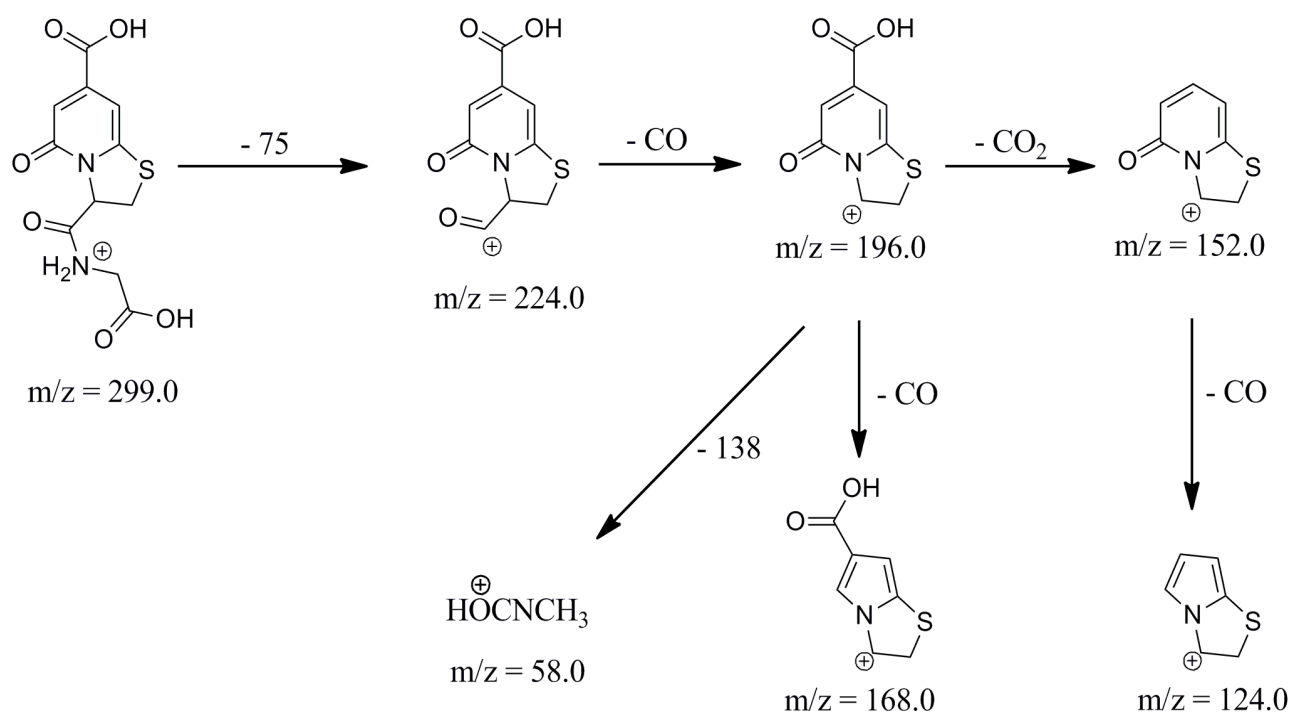

Fig. S5B ESI-MS/MS fragmentation pattern of **6b**.

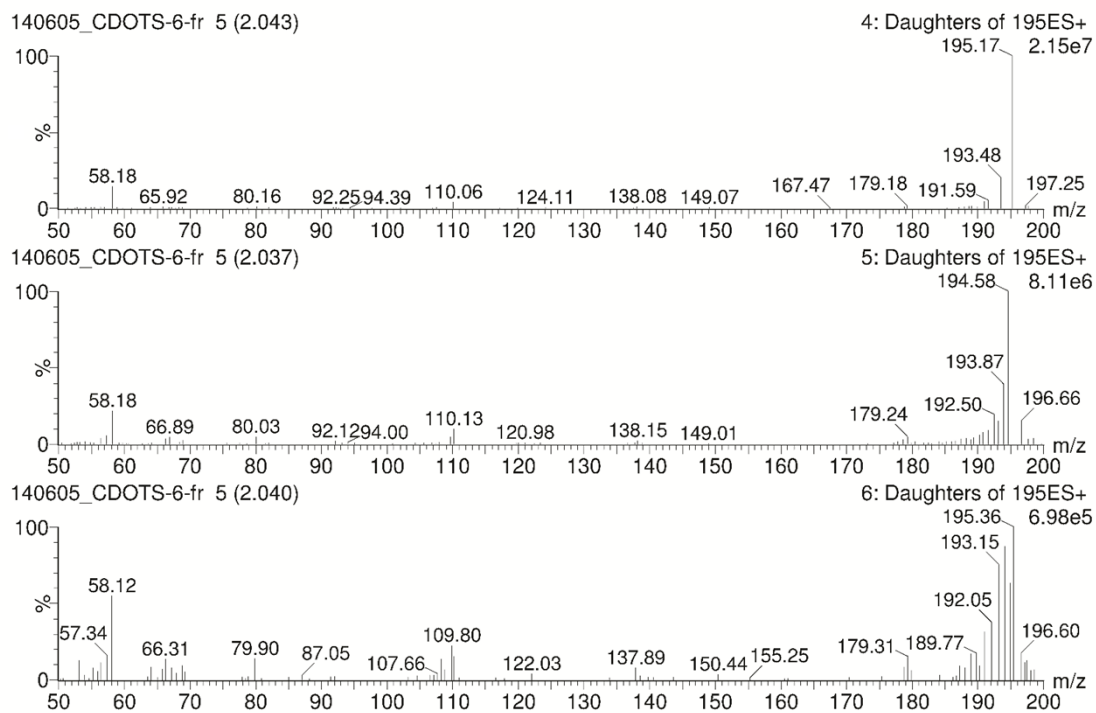

Fig. S6A ESI-MS/MS fragmentation spectra of **7b**.

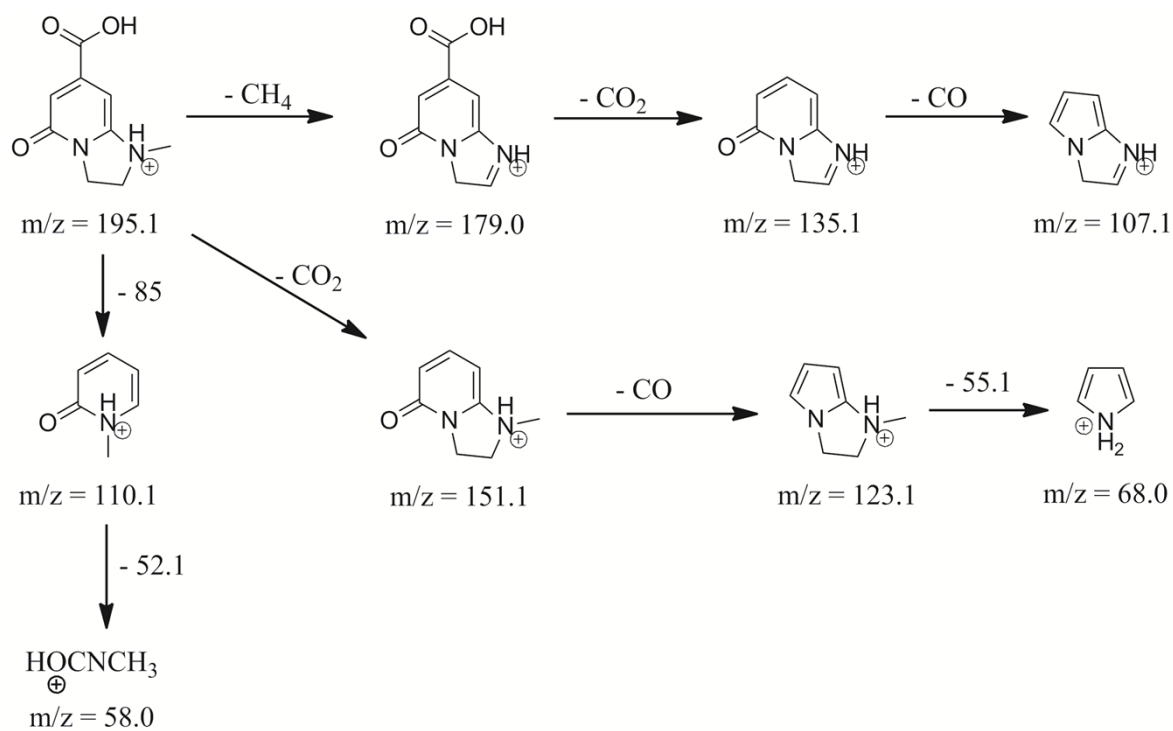

Fig. S6B ESI-MS/MS fragmentation pattern of **7b**.

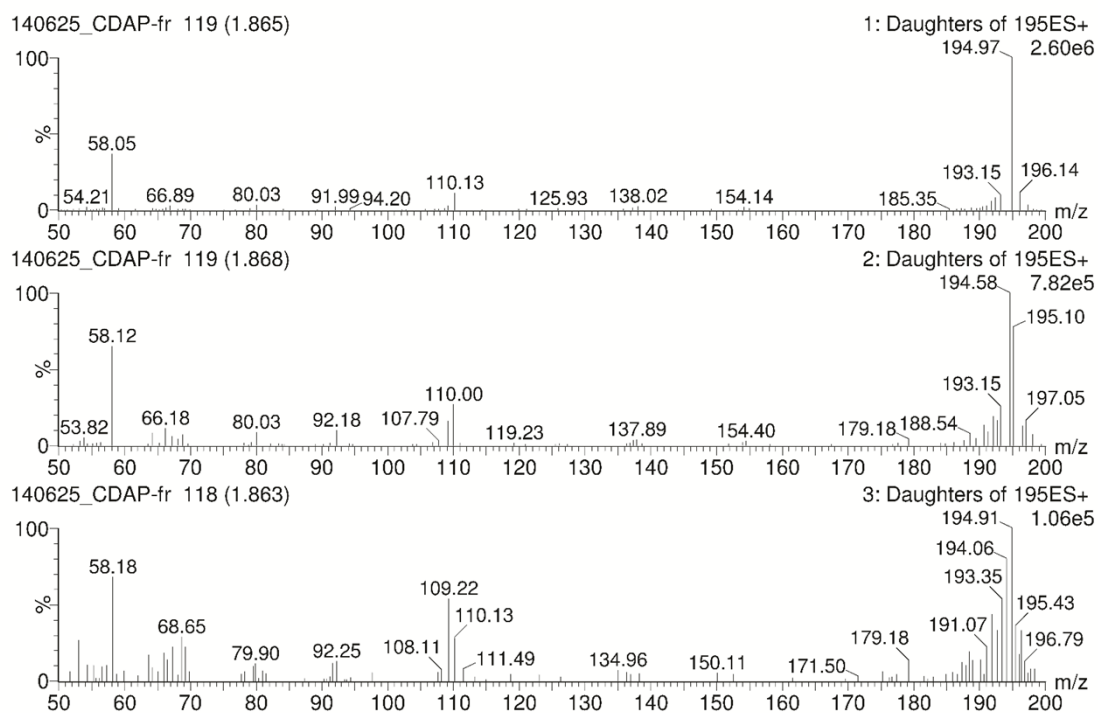

Fig. S7A ESI-MS/MS fragmentation spectra of **8b**.

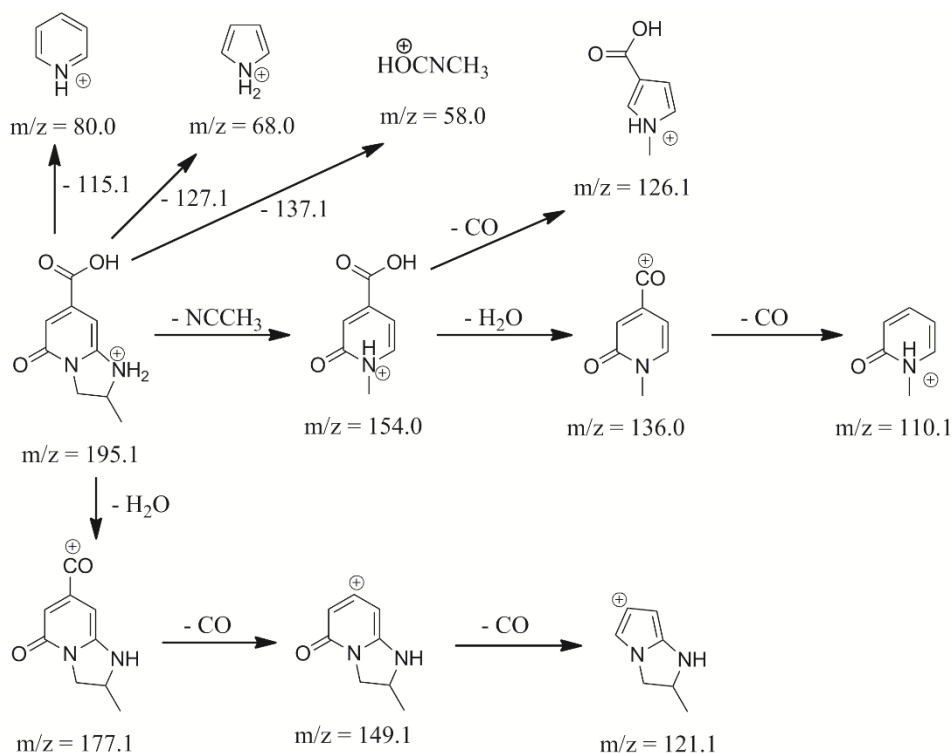

Fig. S7B ESI-MS/MS fragmentation pattern of **8b**.

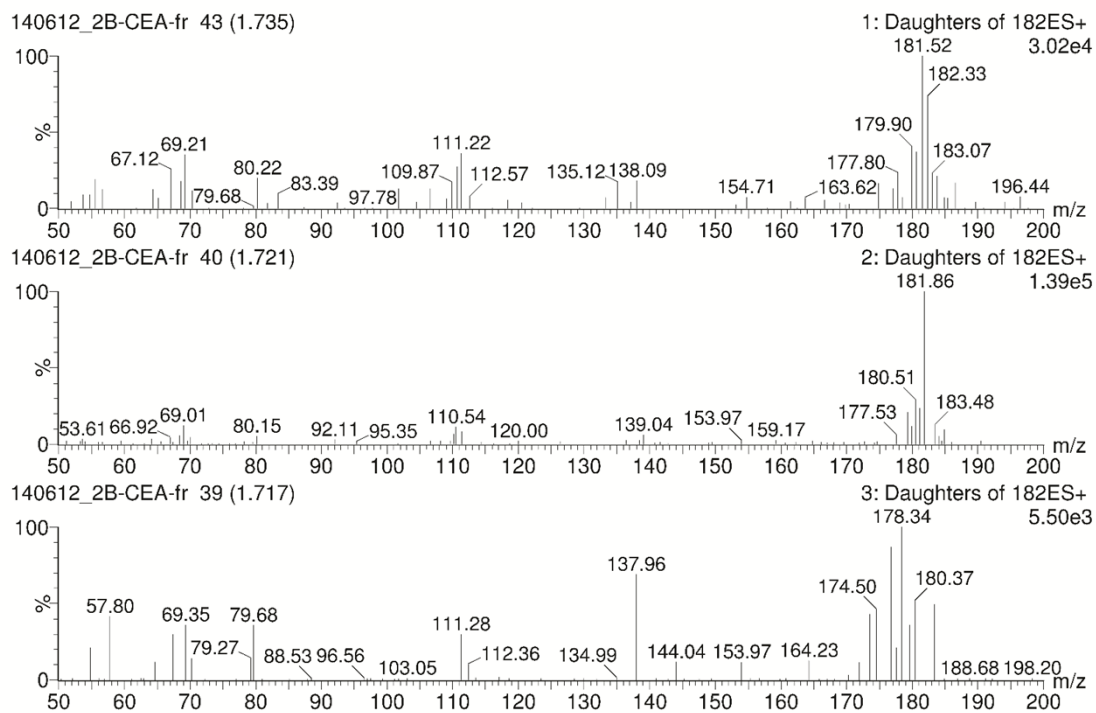

Fig. S8A ESI-MS/MS fragmentation spectra of **14b**.



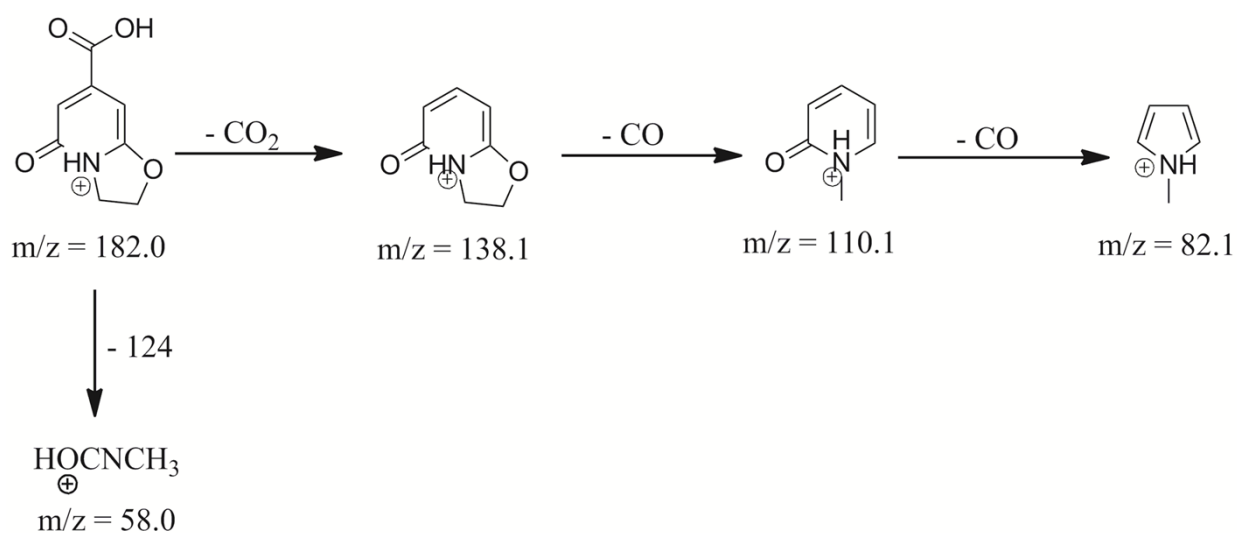

Fig. S8B ESI-MS/MS fragmentation pattern of **14b**.

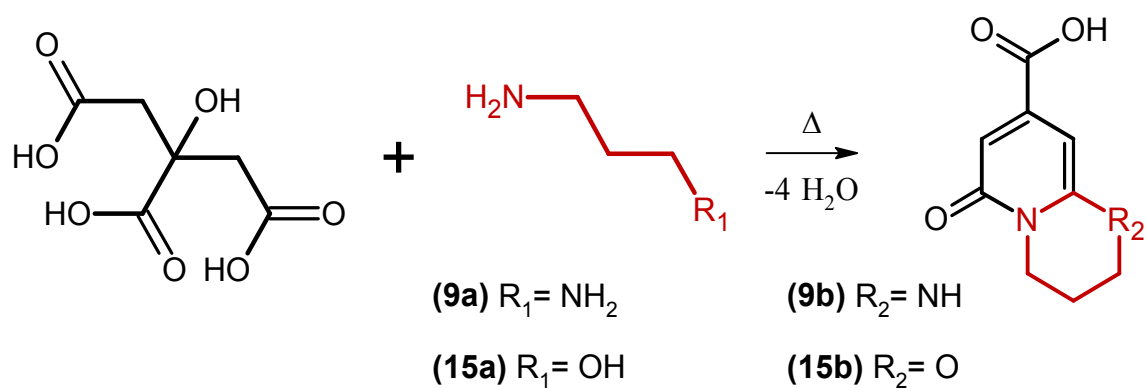

Fig. S9 Formation of fluorescent 2-pyridones from citric acid and selected  $\gamma$ -substituted amines.

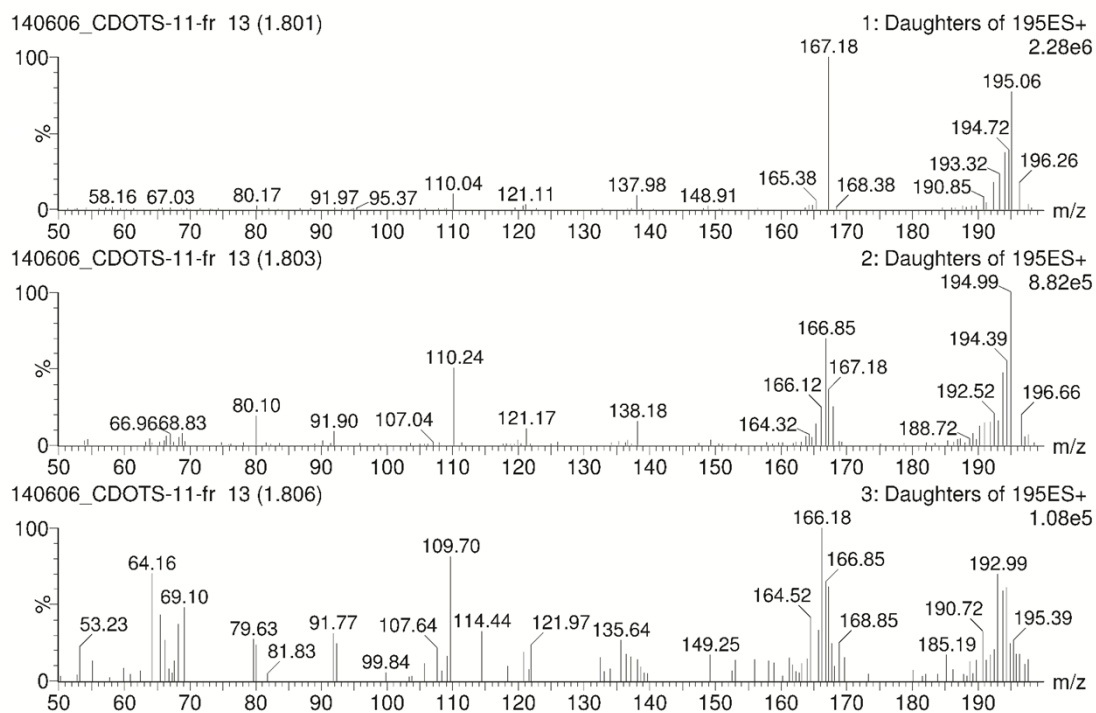

Fig. S10A ESI-MS/MS fragmentation spectra of **9b**.

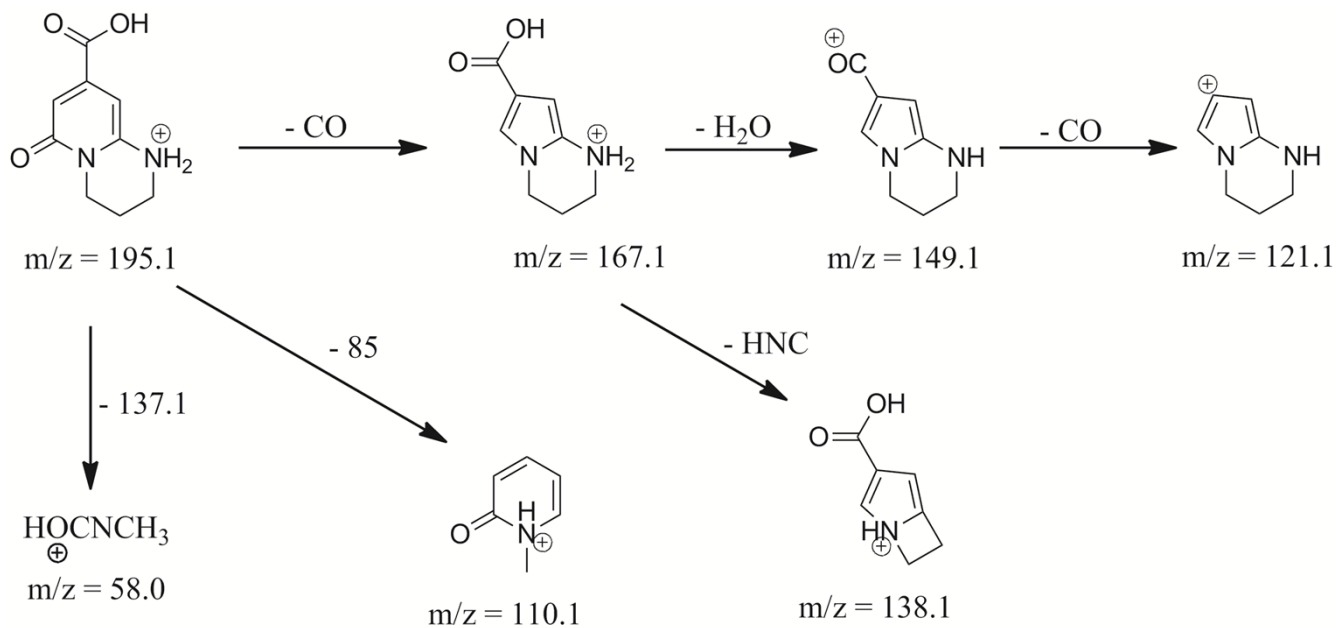

Fig. S10B ESI-MS/MS fragmentation pattern of **9b**.

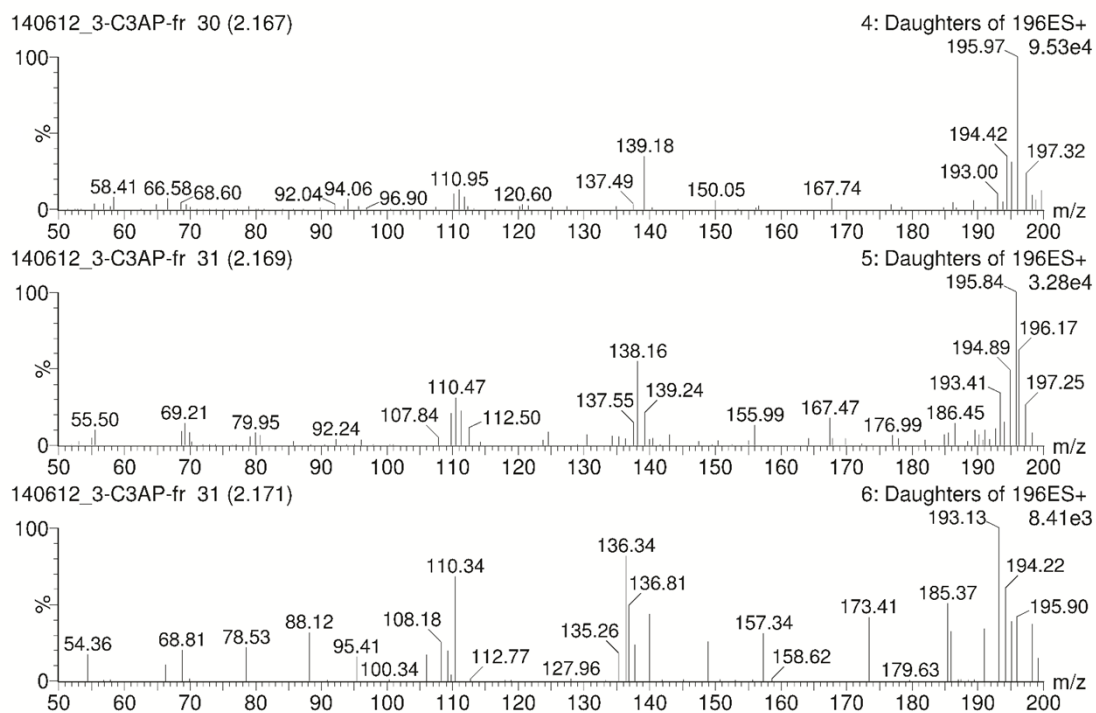

Fig. S11A ESI-MS/MS fragmentation spectra of **15b**.

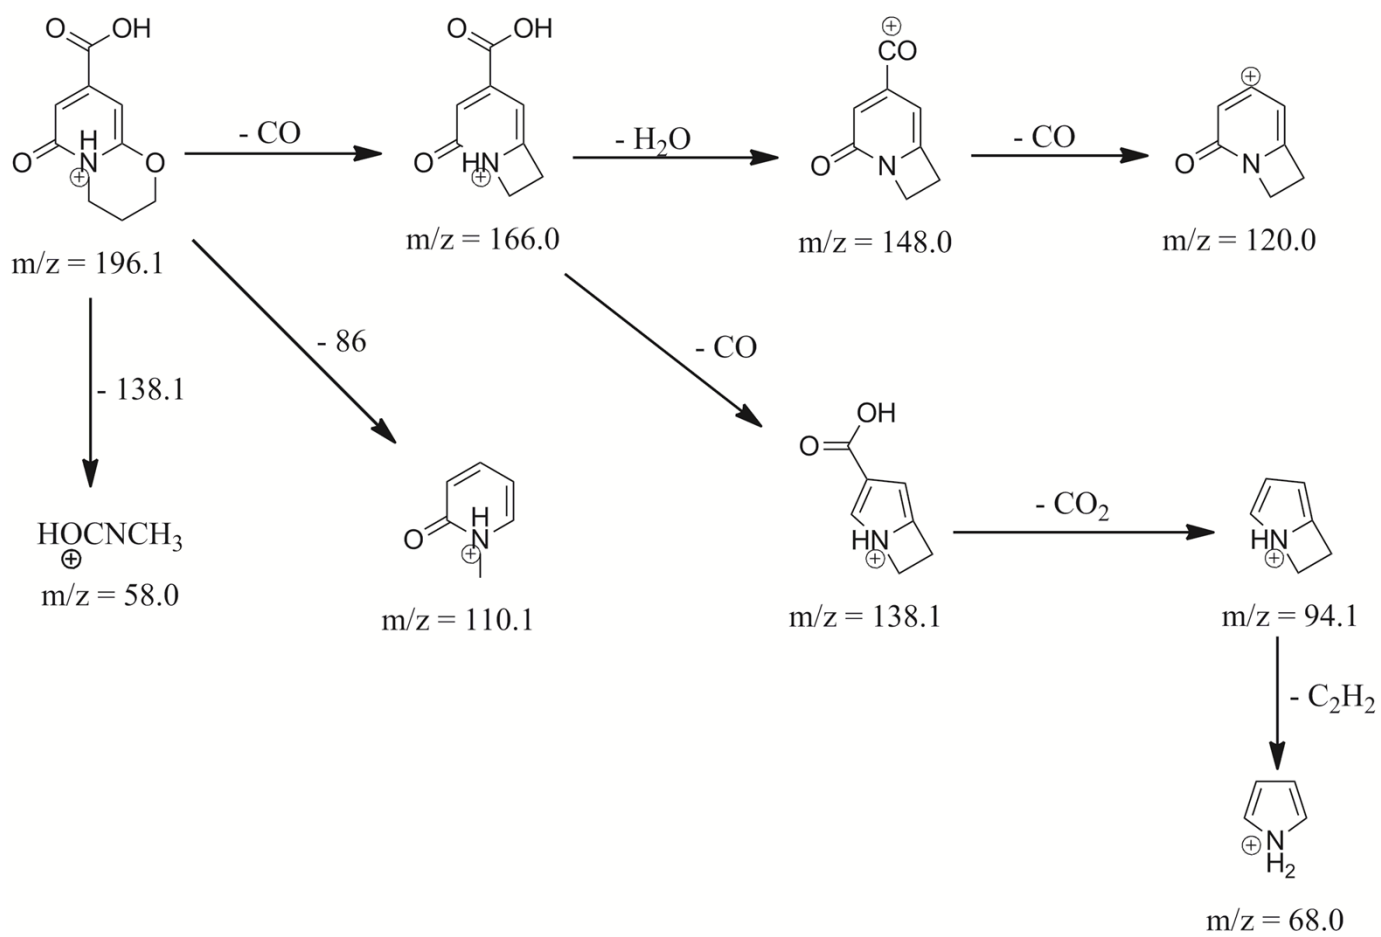

Fig. S11B ESI-MS/MS fragmentation pattern of **15b**.
